# Supplementary material for: Molecular assembly of the period-cryptochrome circadian transcriptional repressor complex
Source: eLife journal article supplement (doi:10.7554/elife.03674), 2014-08-15
Supplement: supp [file elife-03674-supp-v1.zip]

| Construct name  | Insert information                      | Vector           | AA        | MUT       |
|-----------------|-----------------------------------------|------------------|-----------|-----------|
| pCIn-Per2NF     | Per2 with NLS and FlagTag at C-terminus | pCIneo Sall/NotI |           |           |
| pCIn-Per2mIK    | Per2NF carrying mutation in CBD         | pCIneo NheI/NotI | IK        | AA        |
| pCIn-Per2mVLQDP | Per2NF carrying mutation in CBD         | pCIneo NheI/NotI | VLQDP     | AAAAA     |
| pCIn-Per2mIW    | Per2NF carrying mutation in CBD         | pCIneo NheI/NotI | IW        | AA        |
| pCIn-Per2mLLM   | Per2NF carrying mutation in CBD         | pCIneo NheI/NotI | LLM       | AAA       |
| pCIn-Per2mMMTYQ | Per2NF carrying mutation in CBD         | pCIneo NheI/NotI | MMTYQ     | AAAAA     |
| pCIn-Per2mPSRD  | Per2NF carrying mutation in CBD         | pCIneo NheI/NotI | PSRD      | AAAA      |
| pCIn-Per2mVLK   | Per2NF carrying mutation in CBD         | pCIneo NheI/NotI | VLK       | AAA       |
| pCIn-Per2mEKL   | Per2NF carrying mutation in CBD         | pCIneo NheI/NotI | EKL       | AAA       |
| pCIn-Per2mQPRF  | Per2NF carrying mutation in CBD         | pCIneo NheI/NotI | QPRF      | AAAA      |
| pCIn-Per2mQRREL | Per2NF carrying mutation in CBD         | pCIneo NheI/NotI | QRREL     | AAAAA     |
| pCIn-Per2NFmutA | Per2NF carrying mutation in CBD         | pCIneo NheI/NotI | see below | see below |
| pCIn-Per2NFmutB | Per2NF carrying mutation in CBD         | pCIneo NheI/NotI | see below | see below |

1130 1190  
 PER2 IKY**VLQDP**IWLLMANTDDSIMMTYQL**PSRD**LQAVLKEDQEKLKLLQRS**QPRF**TEG**QRREL**R  
 mutA ----AAAAA-----AAAA-----  
 mutB -----AAAA-----AAAAA--

Figure 1—source data 1
