# Supplementary material for: Molecular assembly of the period-cryptochrome circadian transcriptional repressor complex
Source: eLife journal article supplement (doi:10.7554/elife.03674), 2014-08-15
Supplement: supp [file elife-03674-supp-v1.zip]

A  
serine loop

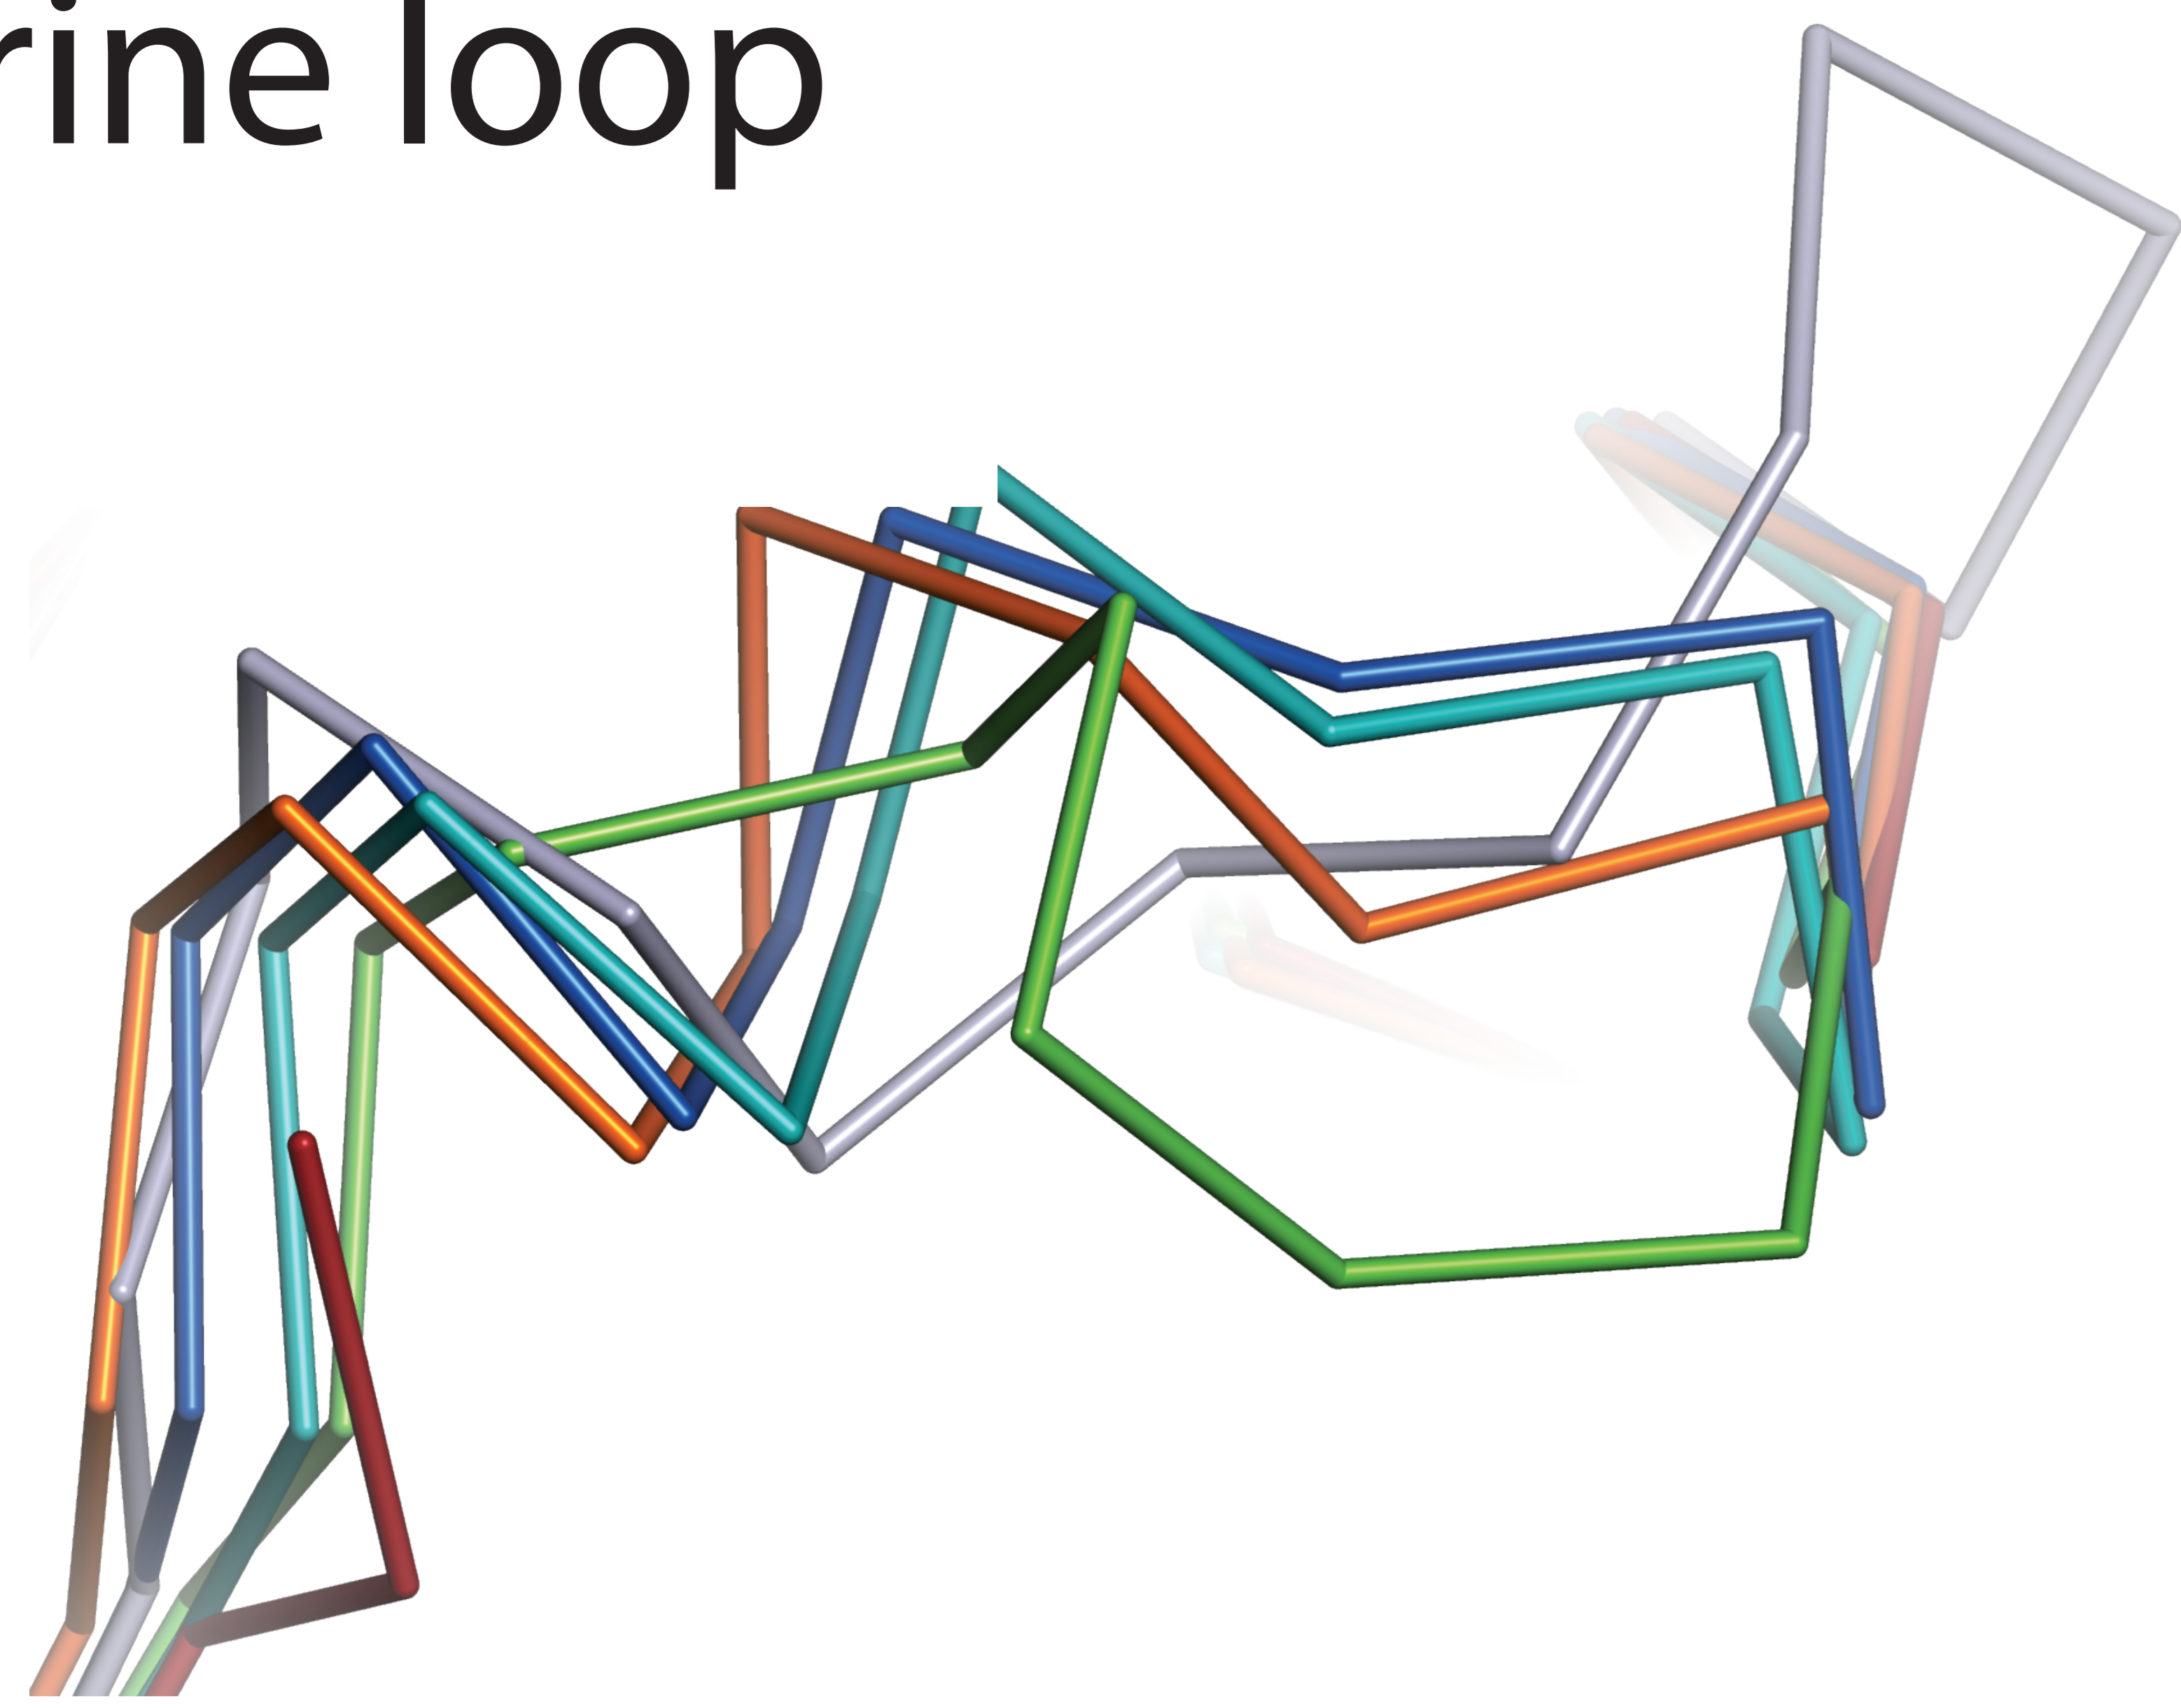

B  
interface loop

C-terminal  
helix

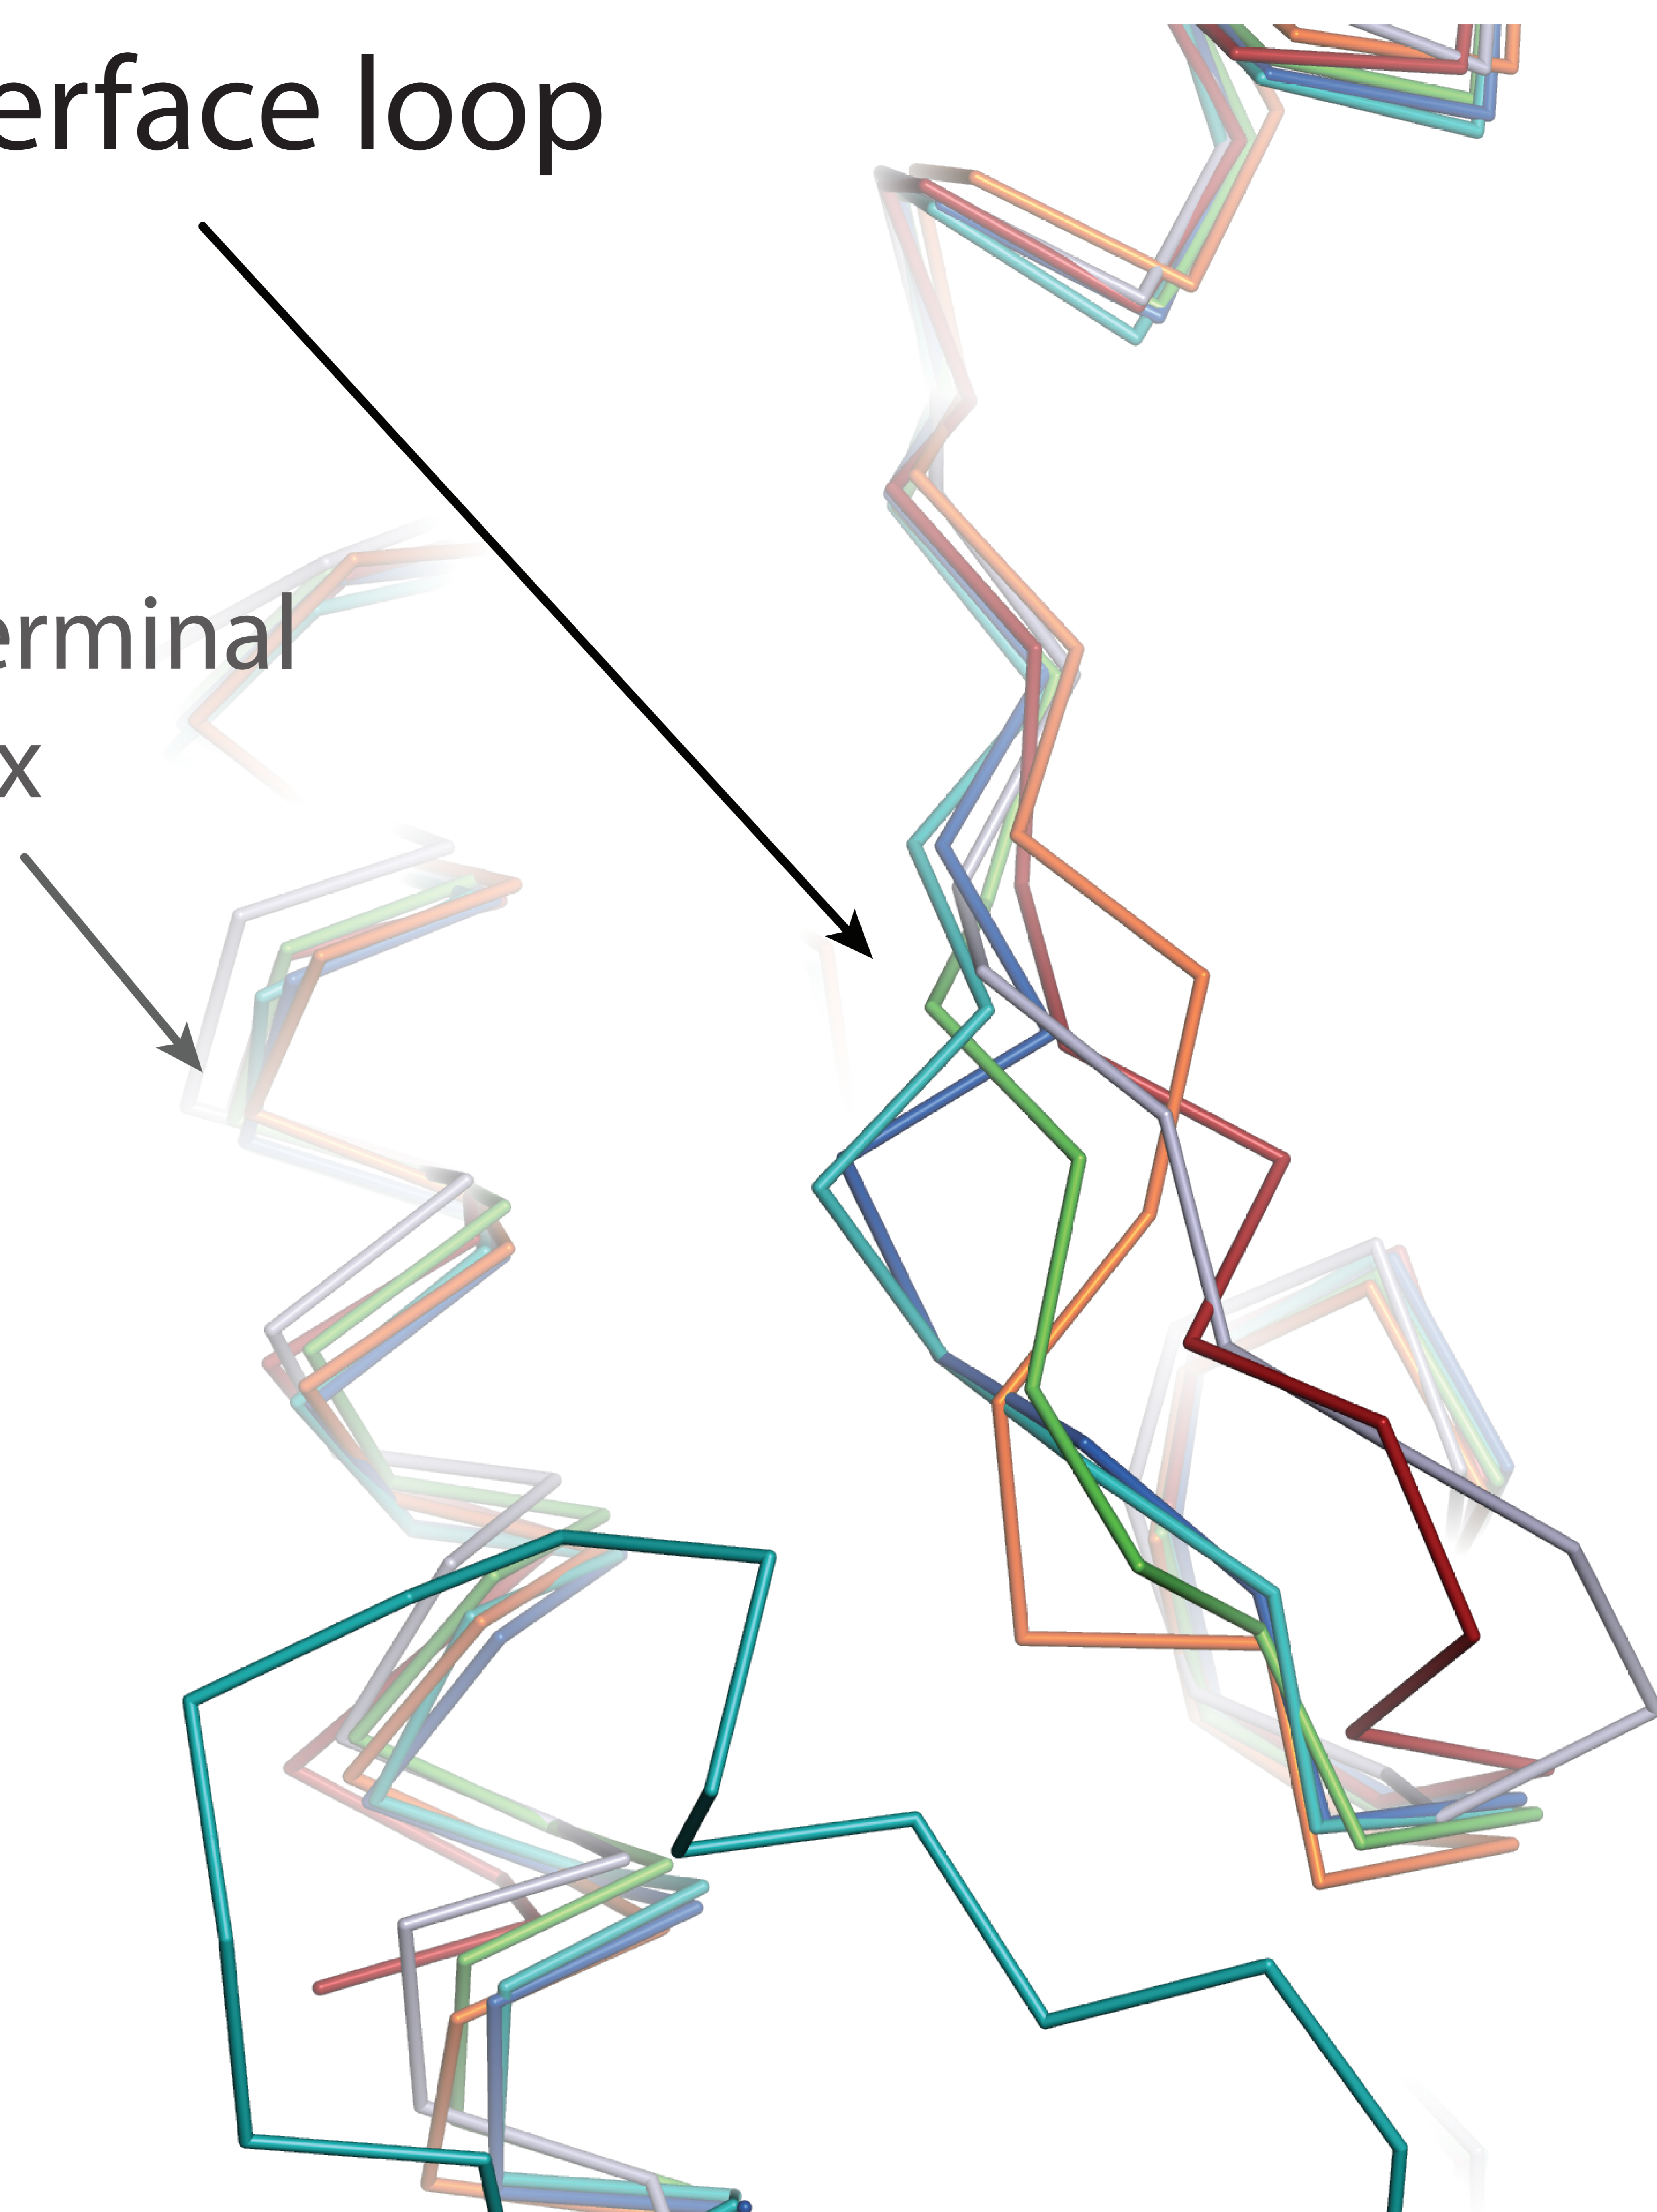

C  
phosphate-binding loop

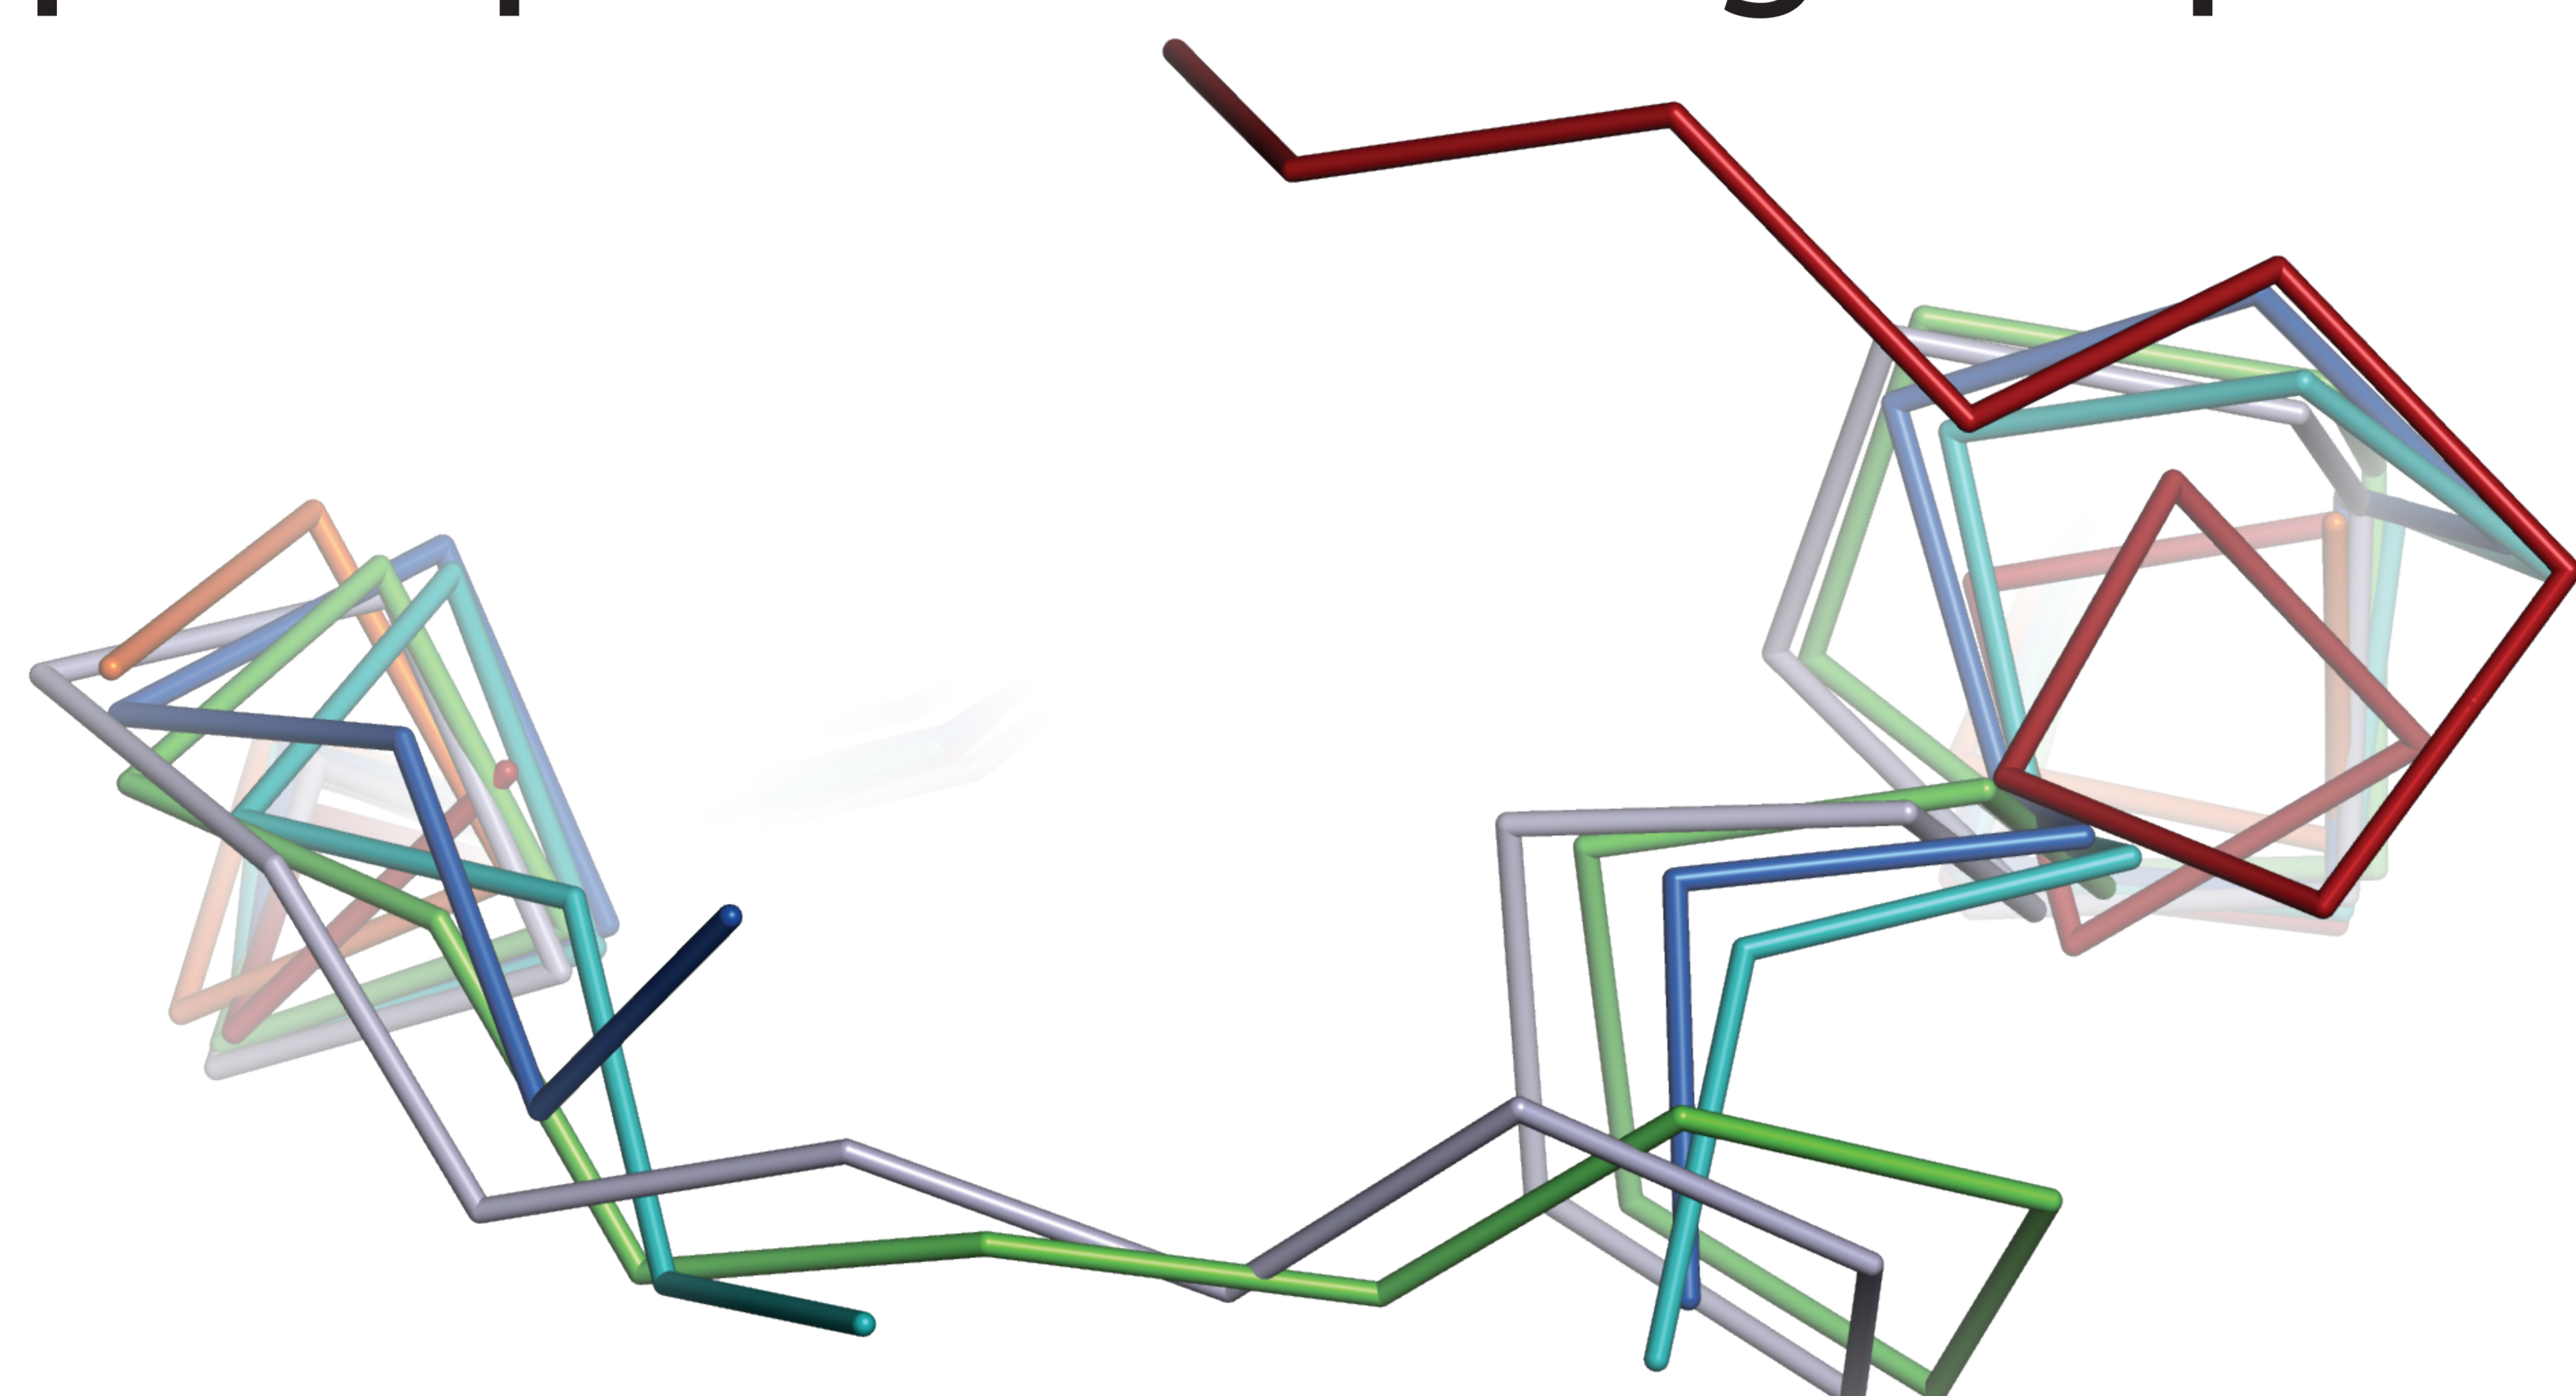

D

CRY1 apo

CRY2 apo

KL001-bound

FAD-bound

FBXL3-bound

PER2-CBD-bound

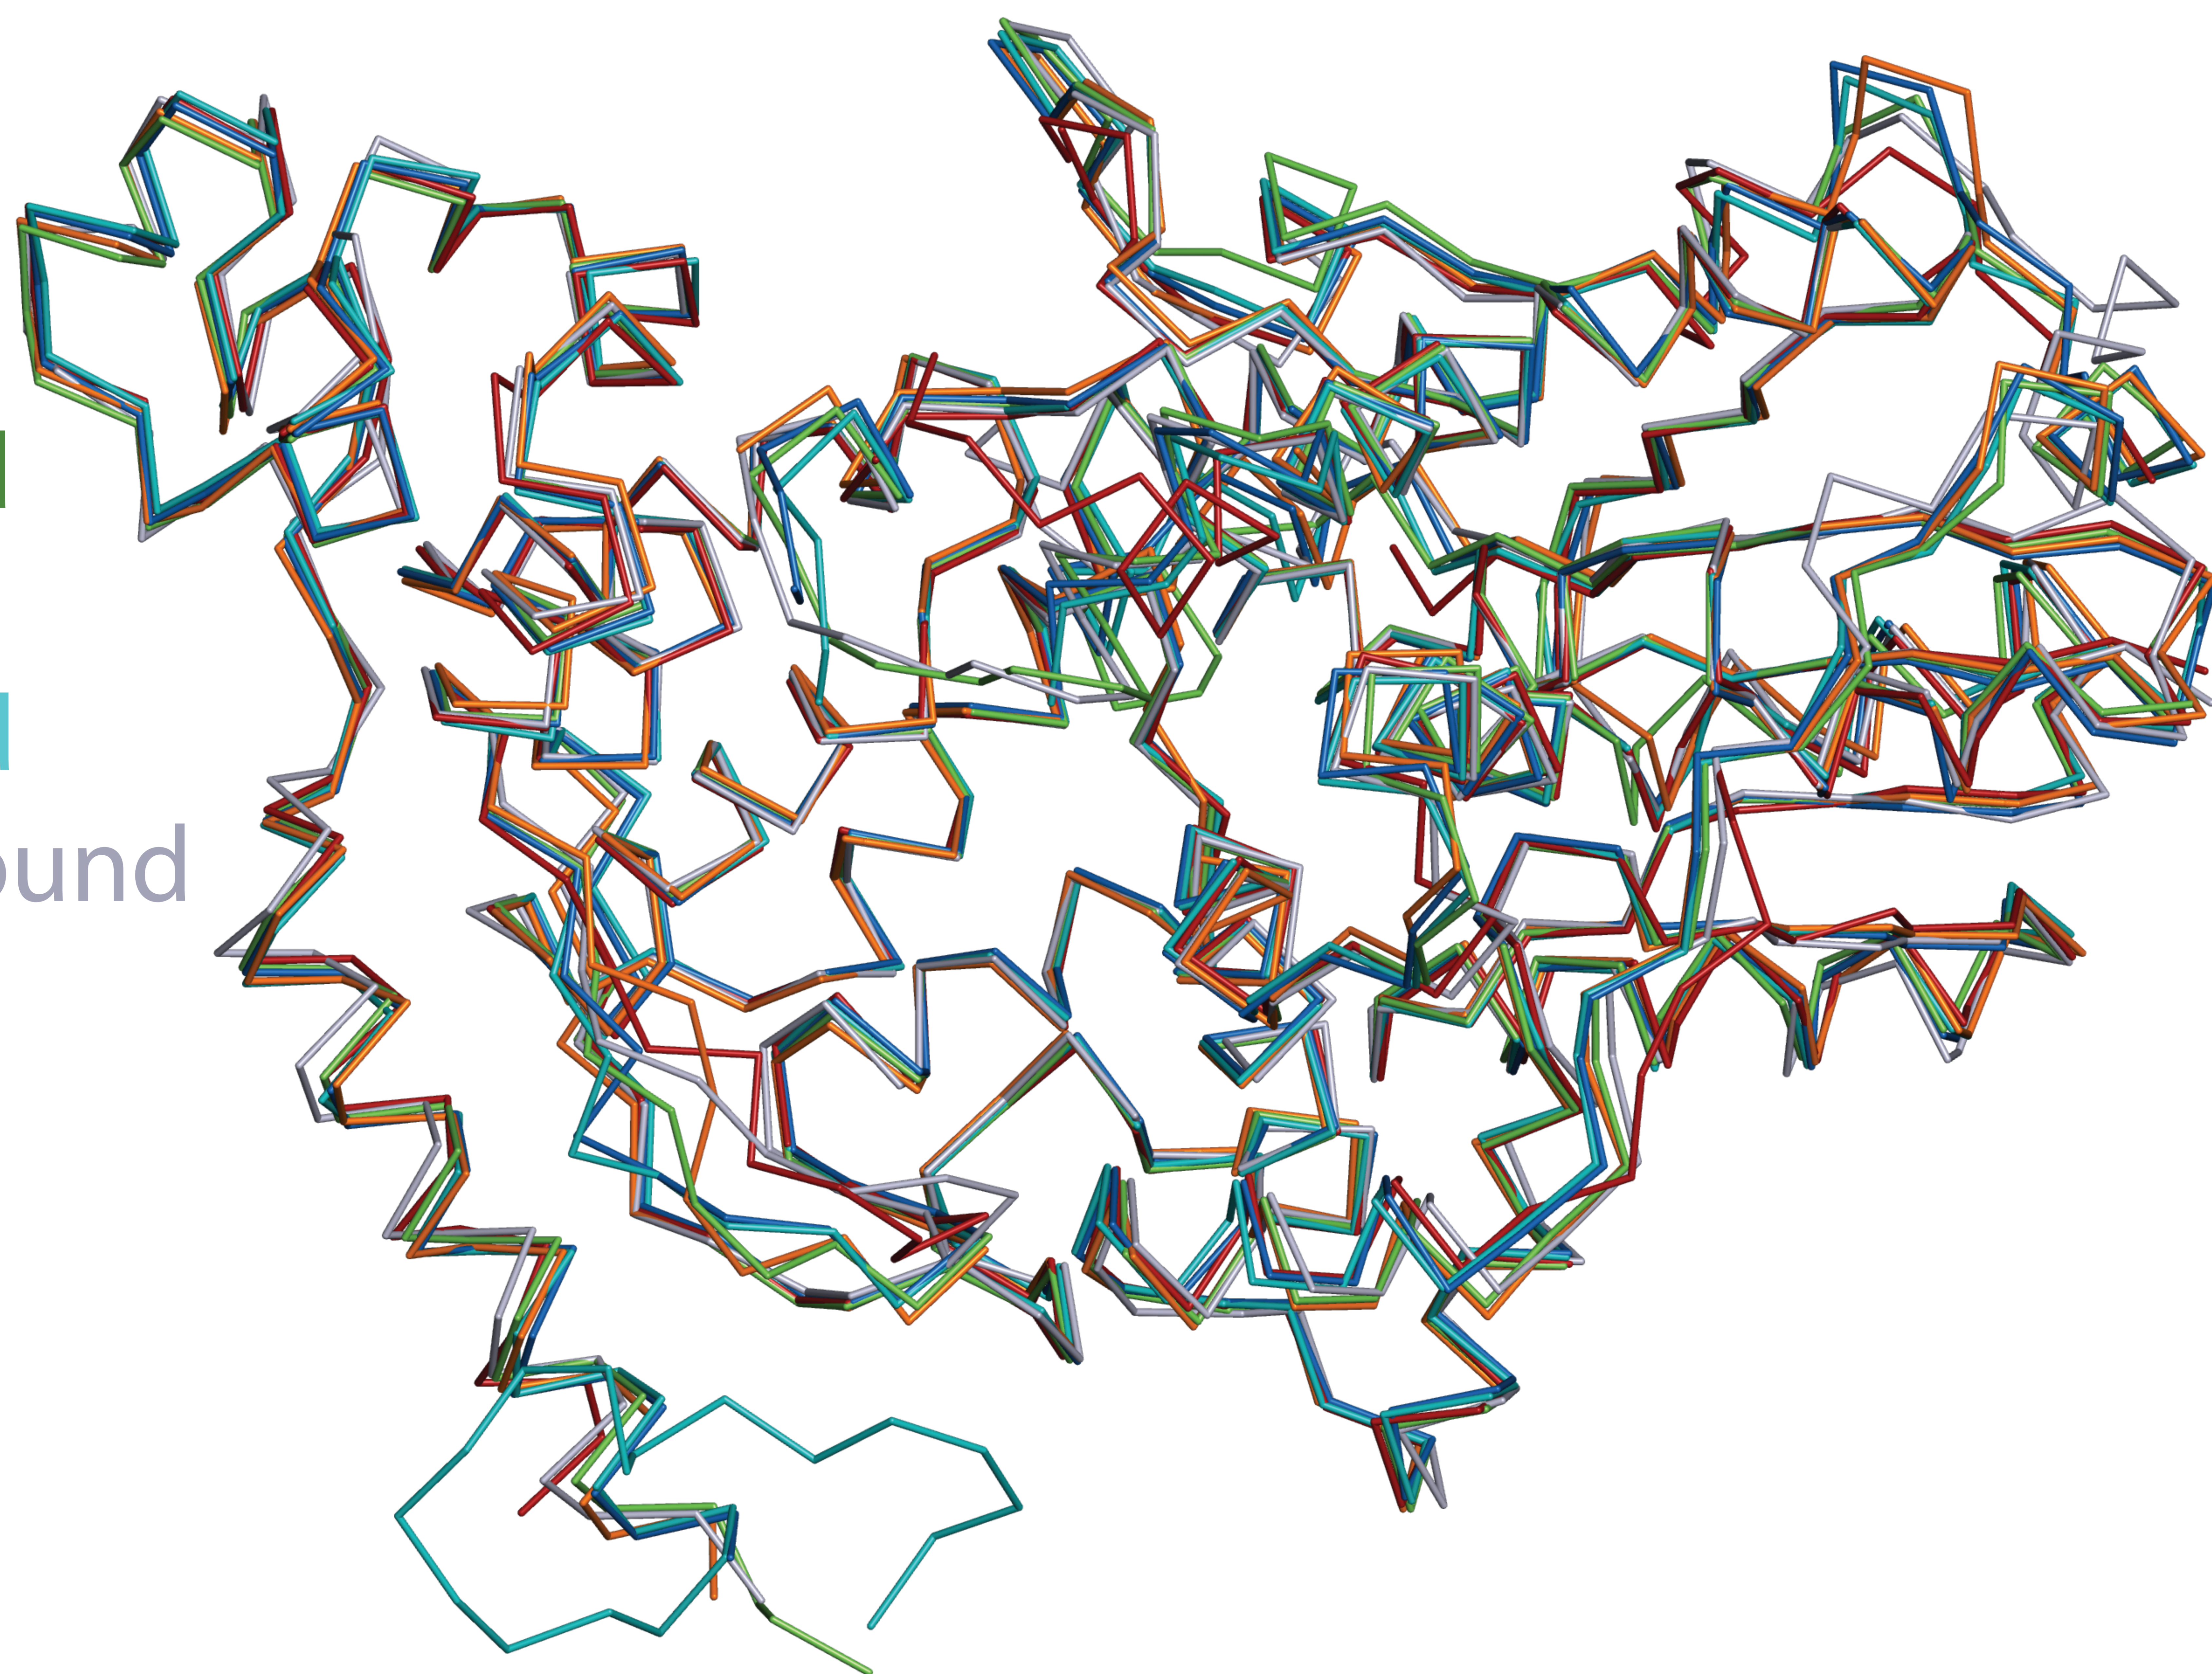

Figure 4—figure supplement 2
