# Supplementary material for: Molecular assembly of the period-cryptochrome circadian transcriptional repressor complex
Source: eLife journal article supplement (doi:10.7554/elife.03674), 2014-08-15
Supplement: supp [file elife_poa_e03674_Rich_Media_Table_1.docx]

# Table 1. Data collection and refinement statistics

**Data collection**

CRY2-PER2

Space group P41

Cell dimensions

*a*, *b*, *c* (Å) 97.67 97.67 163.21

α, β, γ (°) 90 90 90

Resolution (Å) 2.9 (2.8)

*R*meas 0.06 (0.8)

*I* / σ*I* 18.8 (2.1)

Completeness (%) 99.6 (98.2)

Redundancy 4.2 (4.2)

# Refinement

Resolution (Å) 42.7-2.8

No. reflections 37541 (3671)

*R*work / *R*free 20.5/27.7

No. atoms 9342

Protein 9292

Ligand/ion 2

Water 48

*B*-factors 97.3

Protein 97.5

Ligand/ion 114.1

Water 66.3

R.m.s. deviations

Bond lengths (Å) 0.009

Bond angles (°) 1.3
