# Supplementary figures and images for: Molecular assembly of the period-cryptochrome circadian transcriptional repressor complex
Source: eLife journal article supplement (doi:10.7554/elife.03674), 2014-08-15

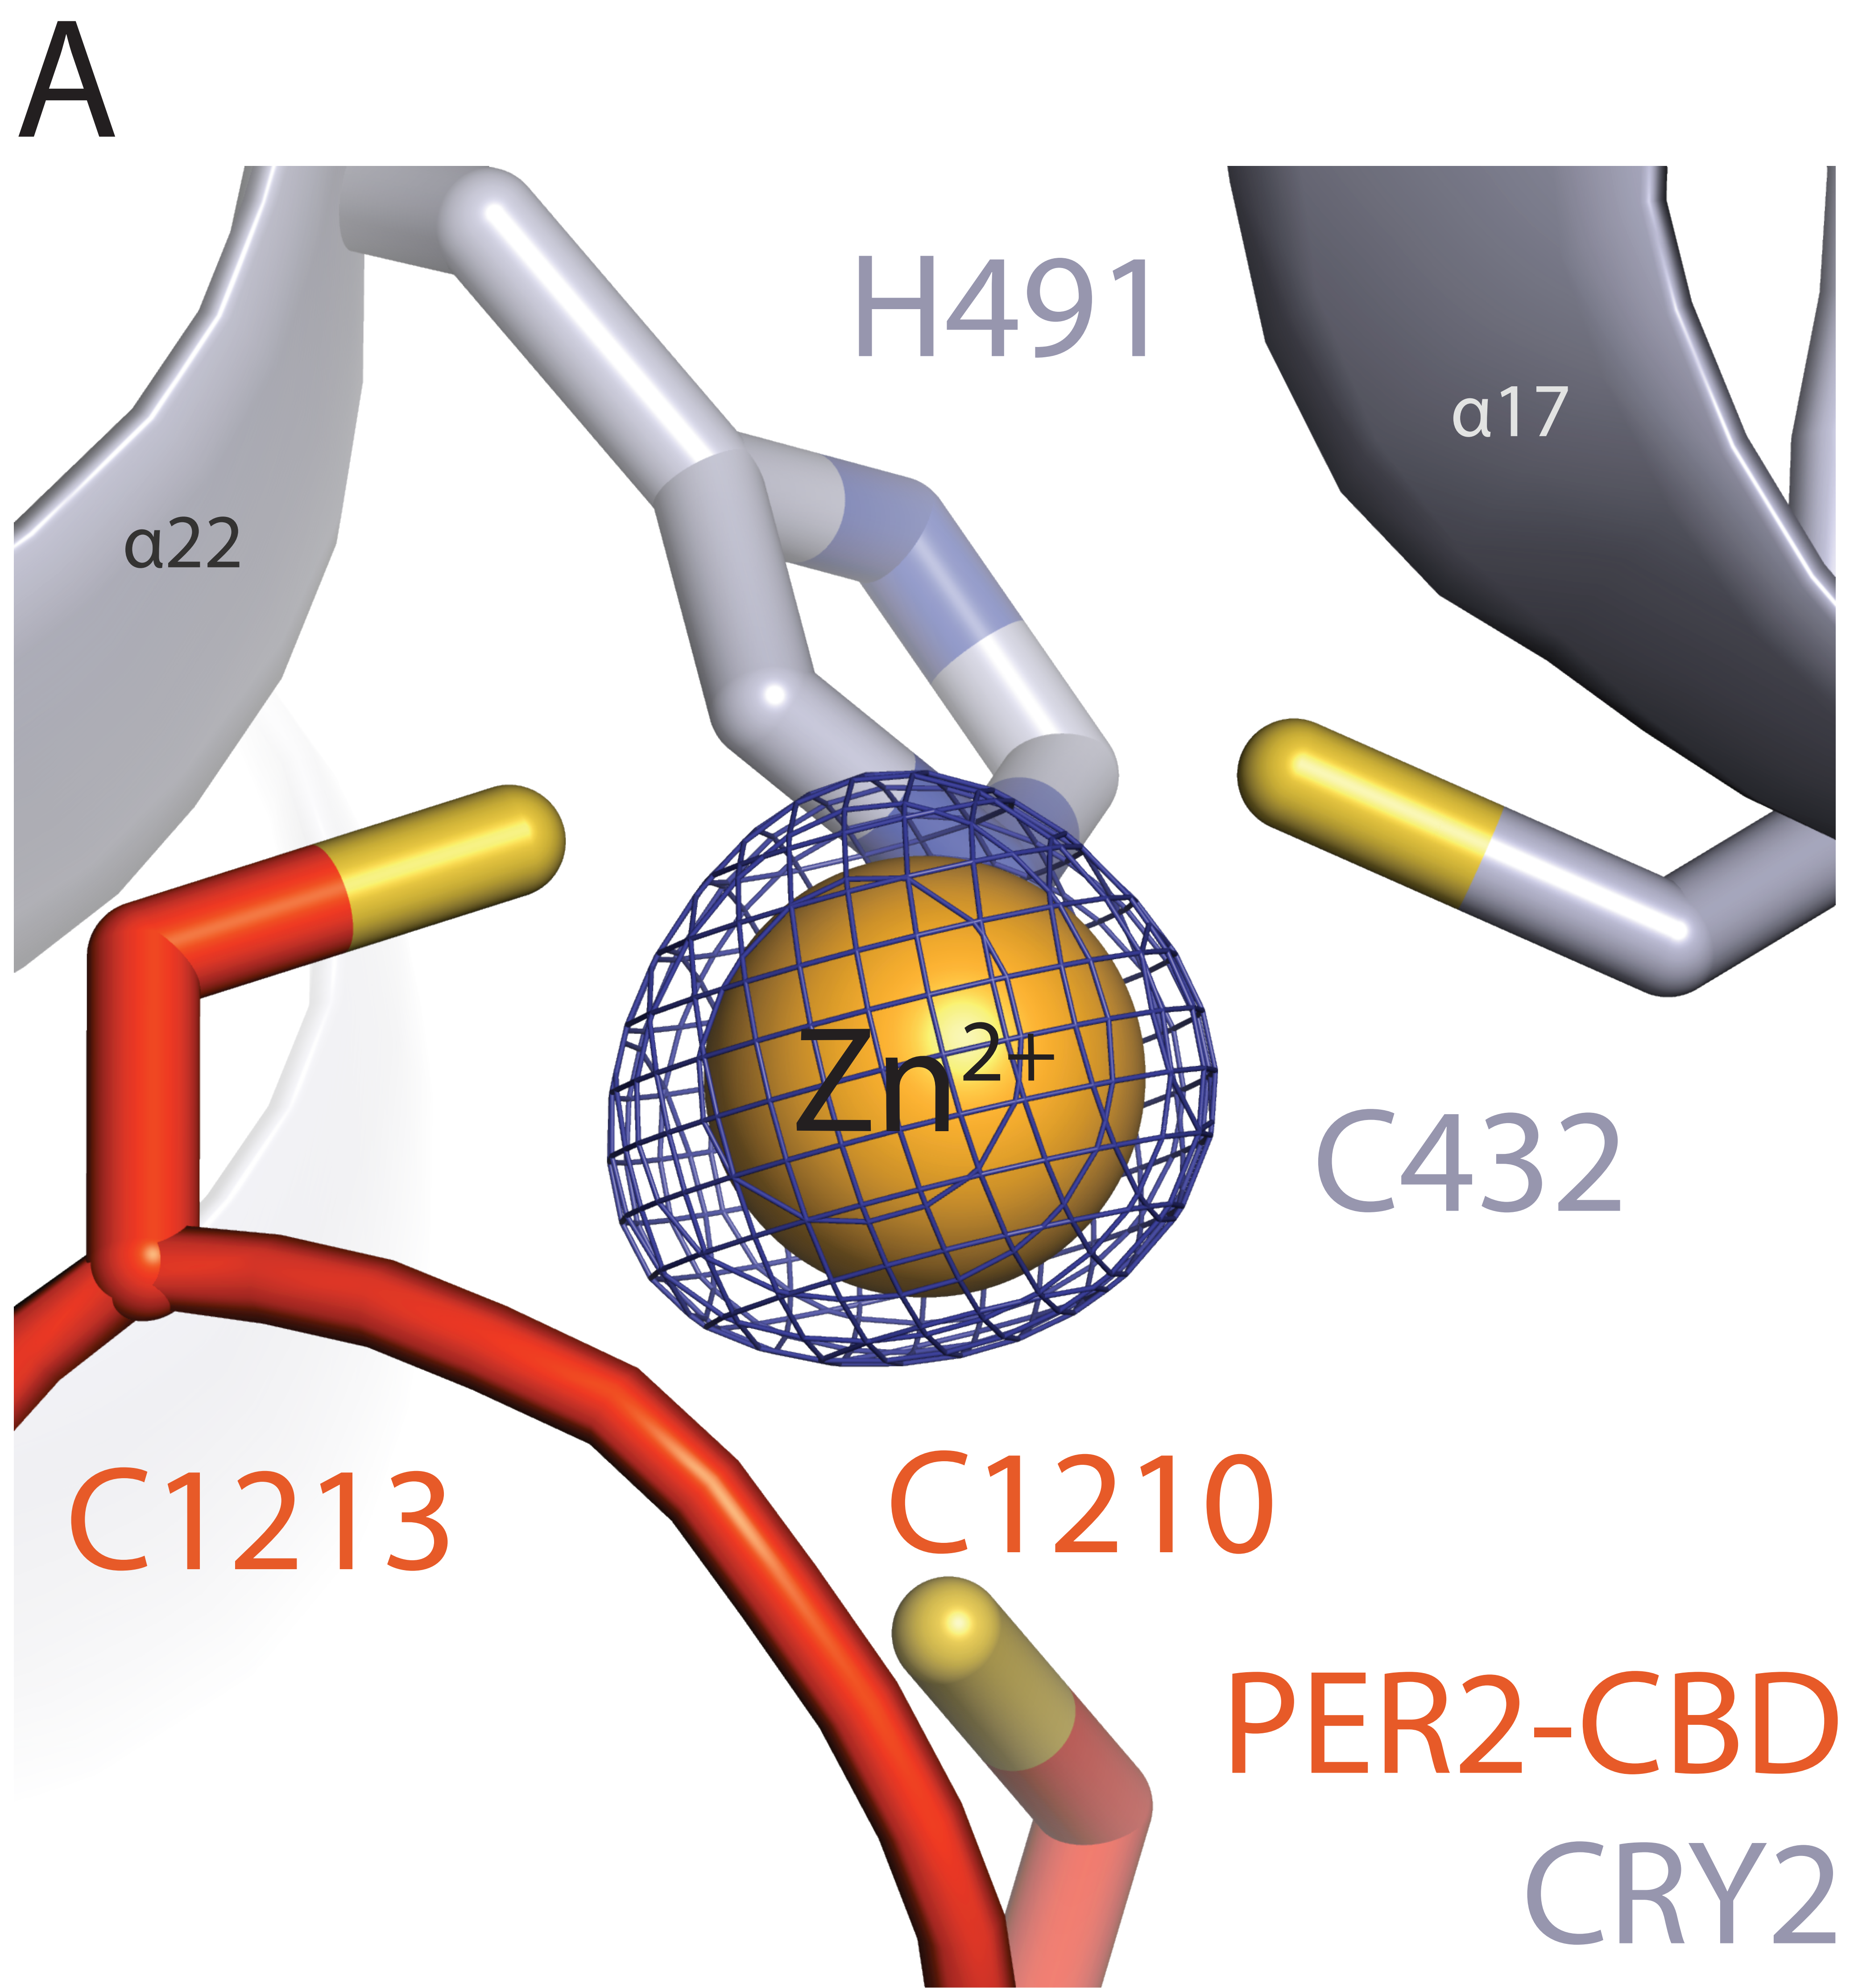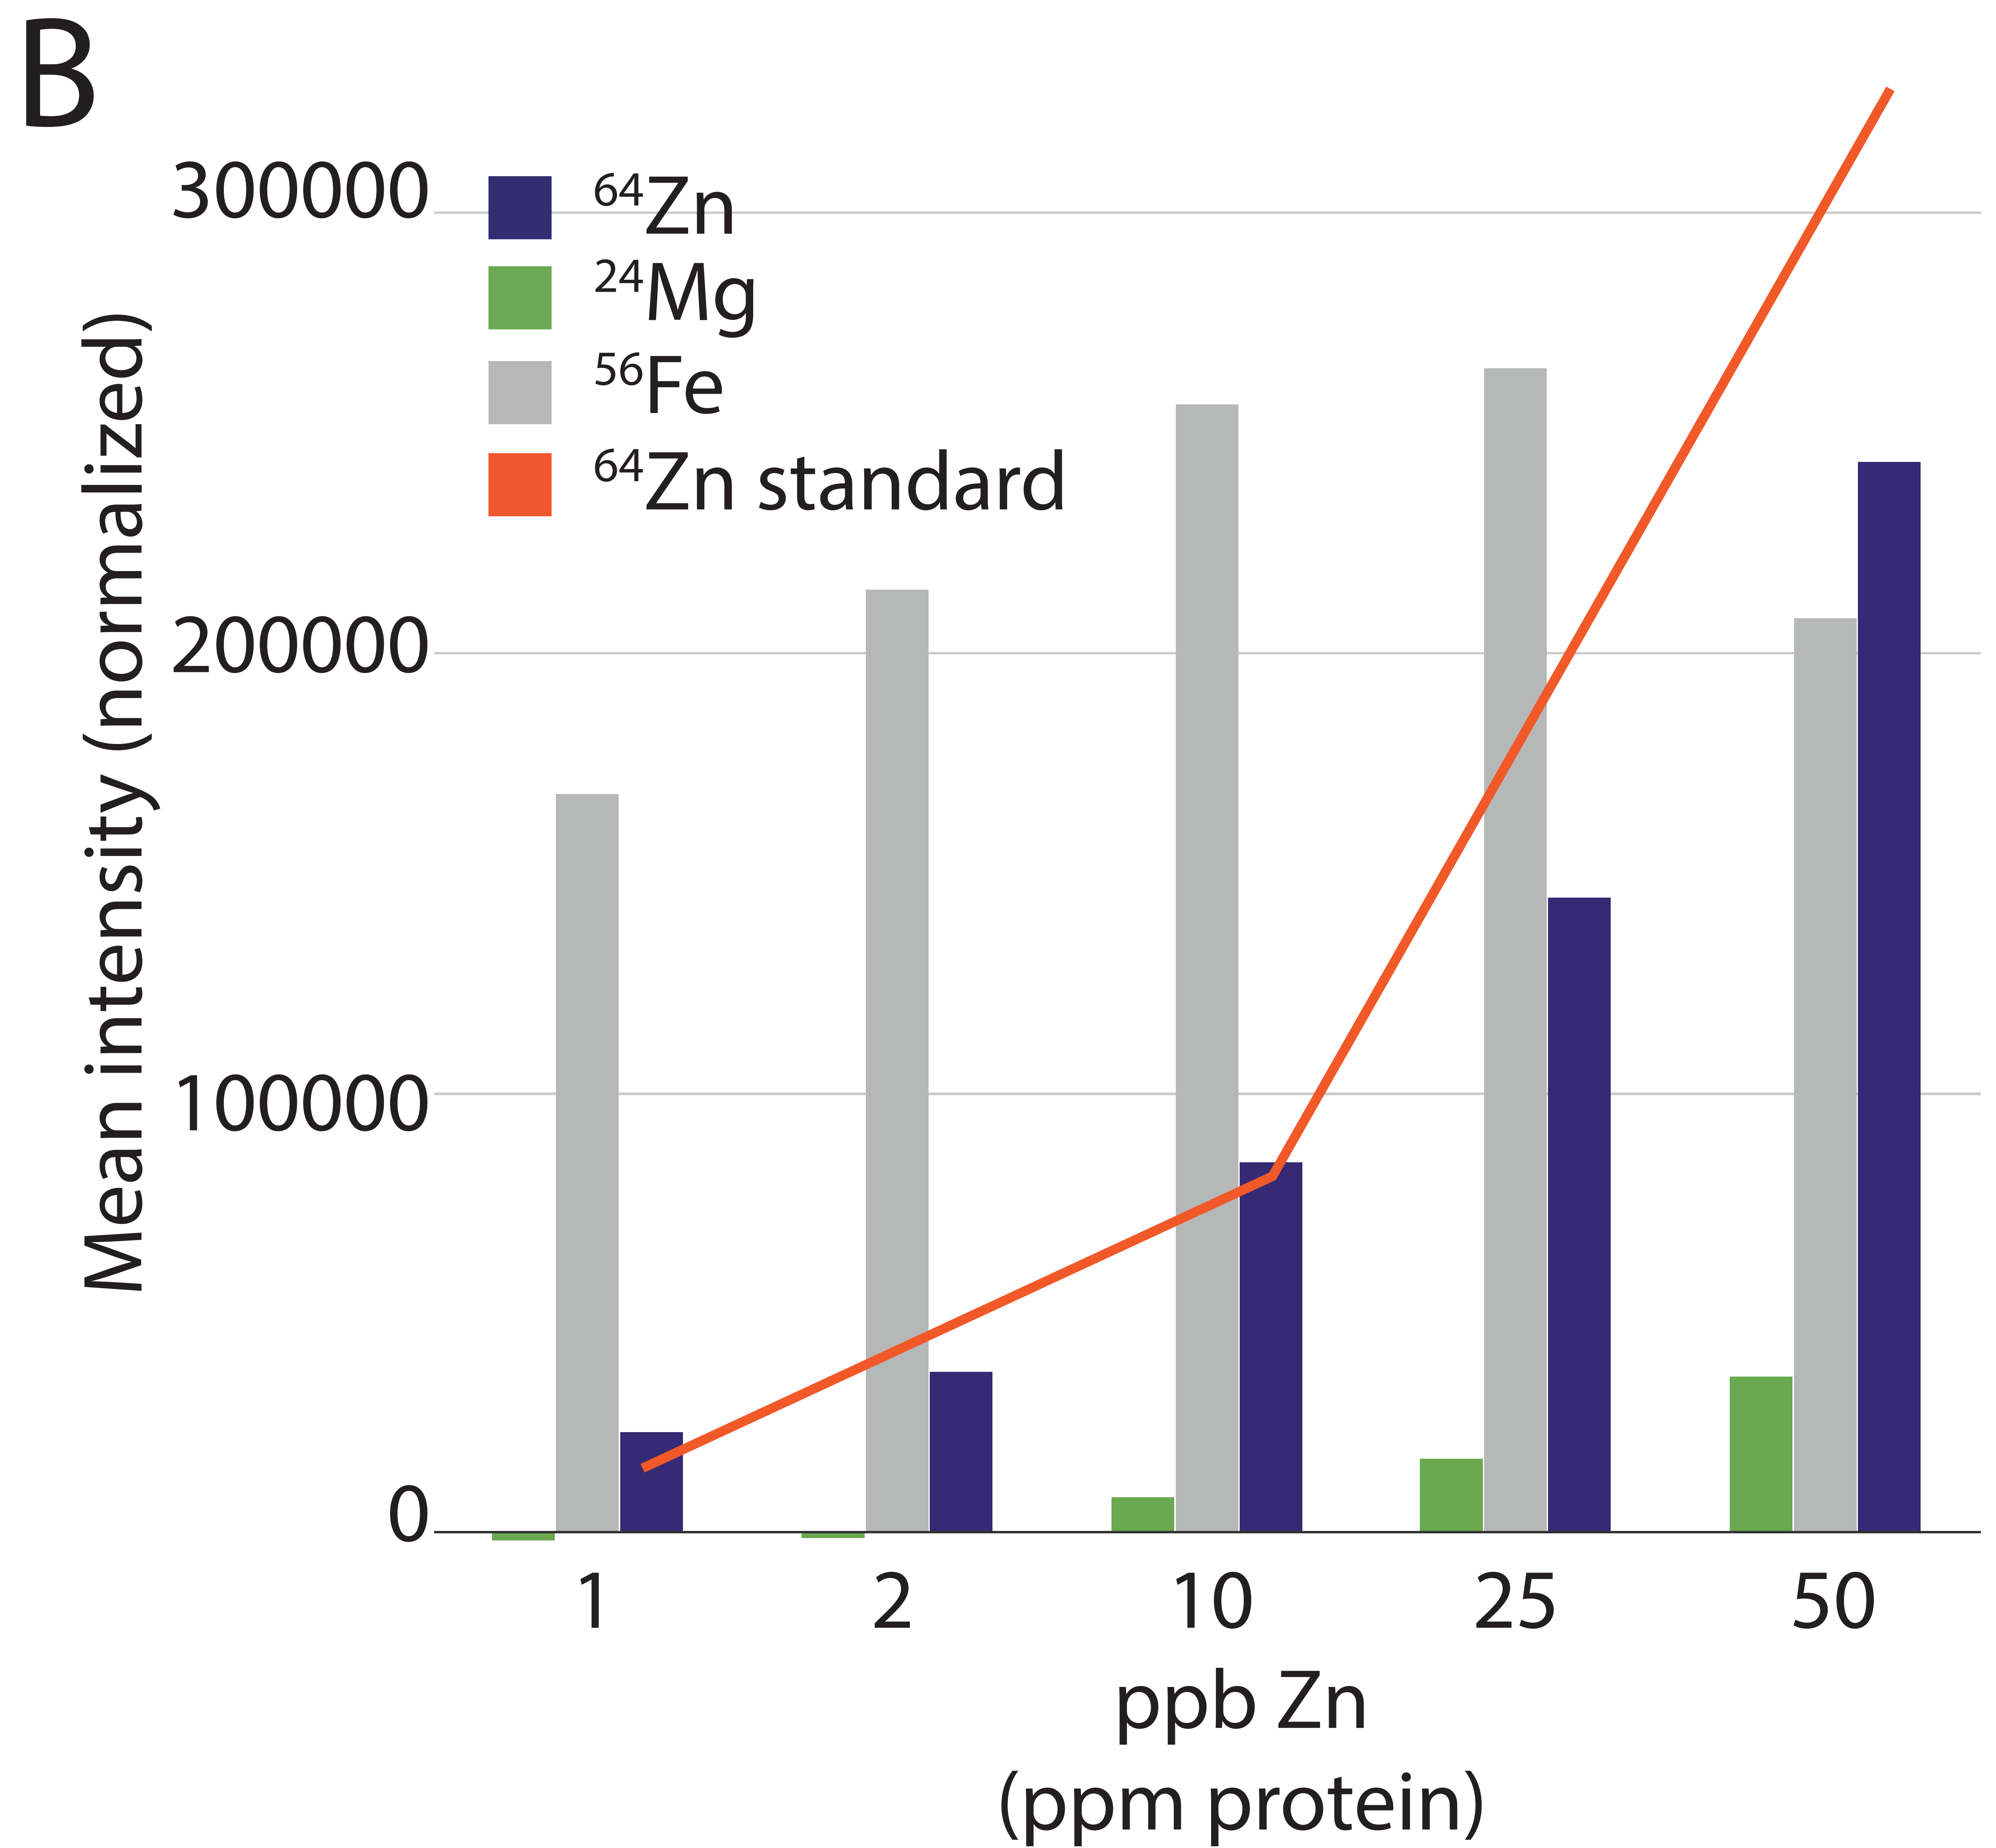

Figure 3—figure supplement 1

Supplement: supp [file elife-03674-supp-v1.zip]

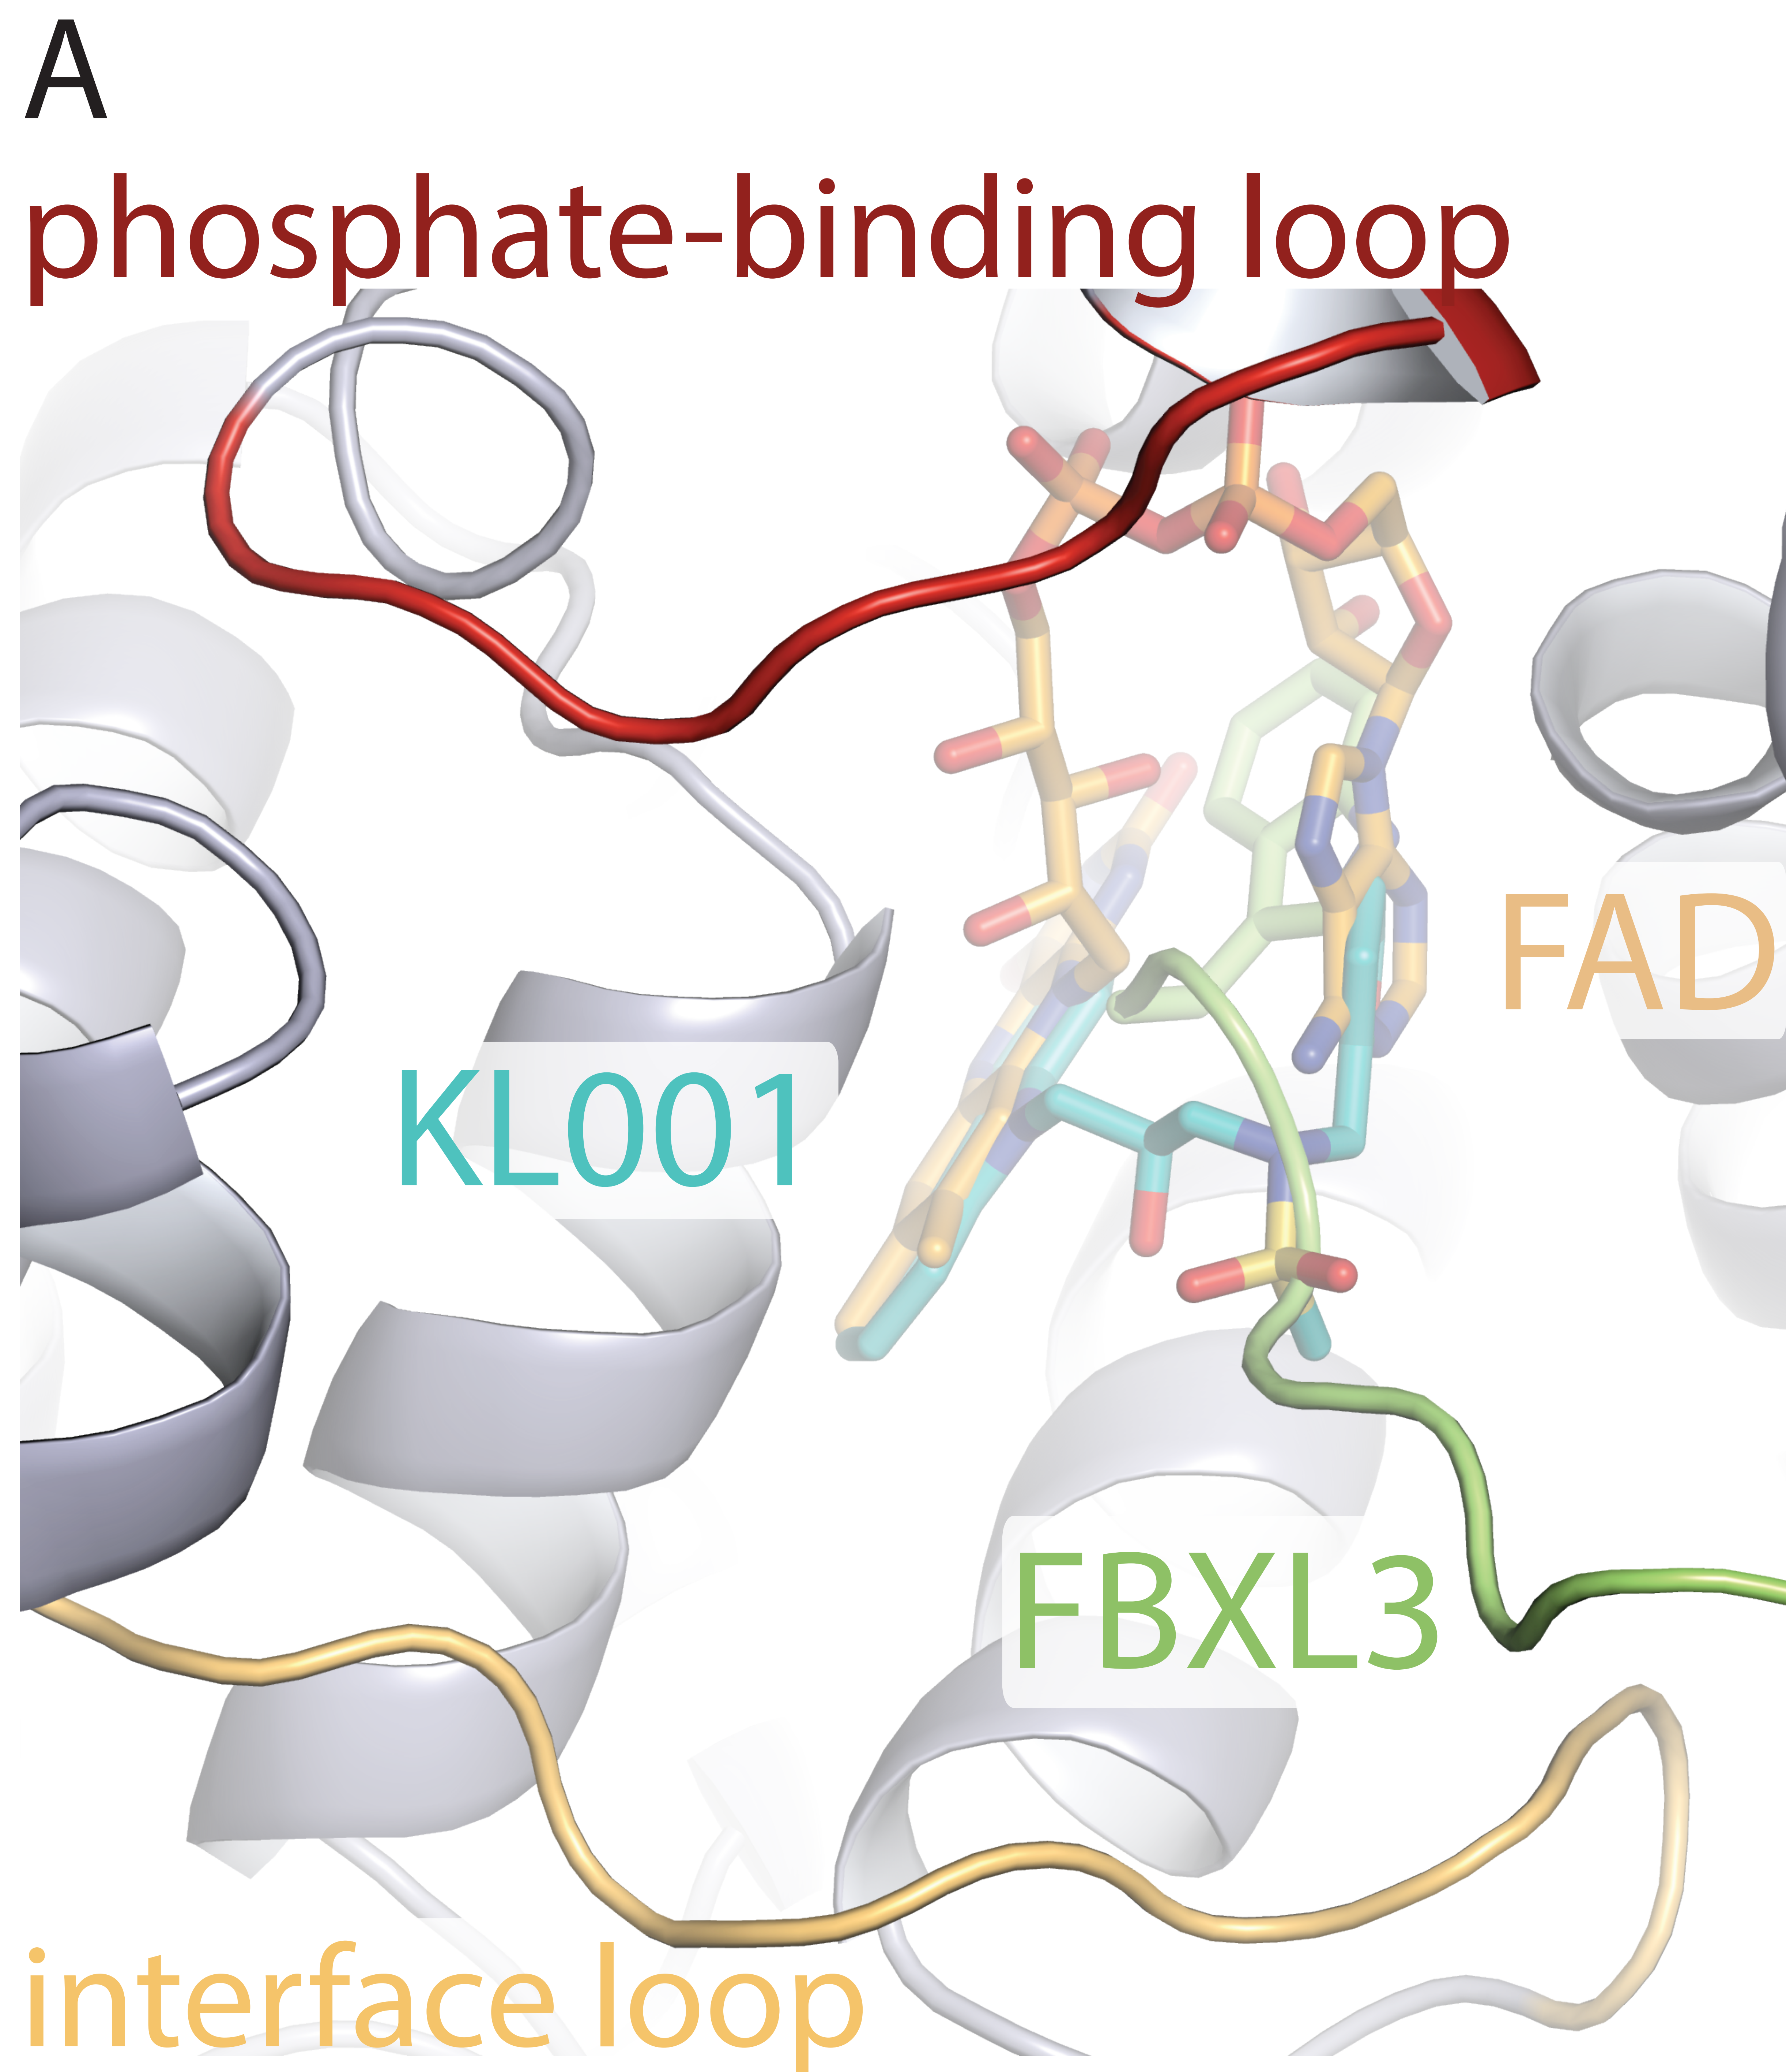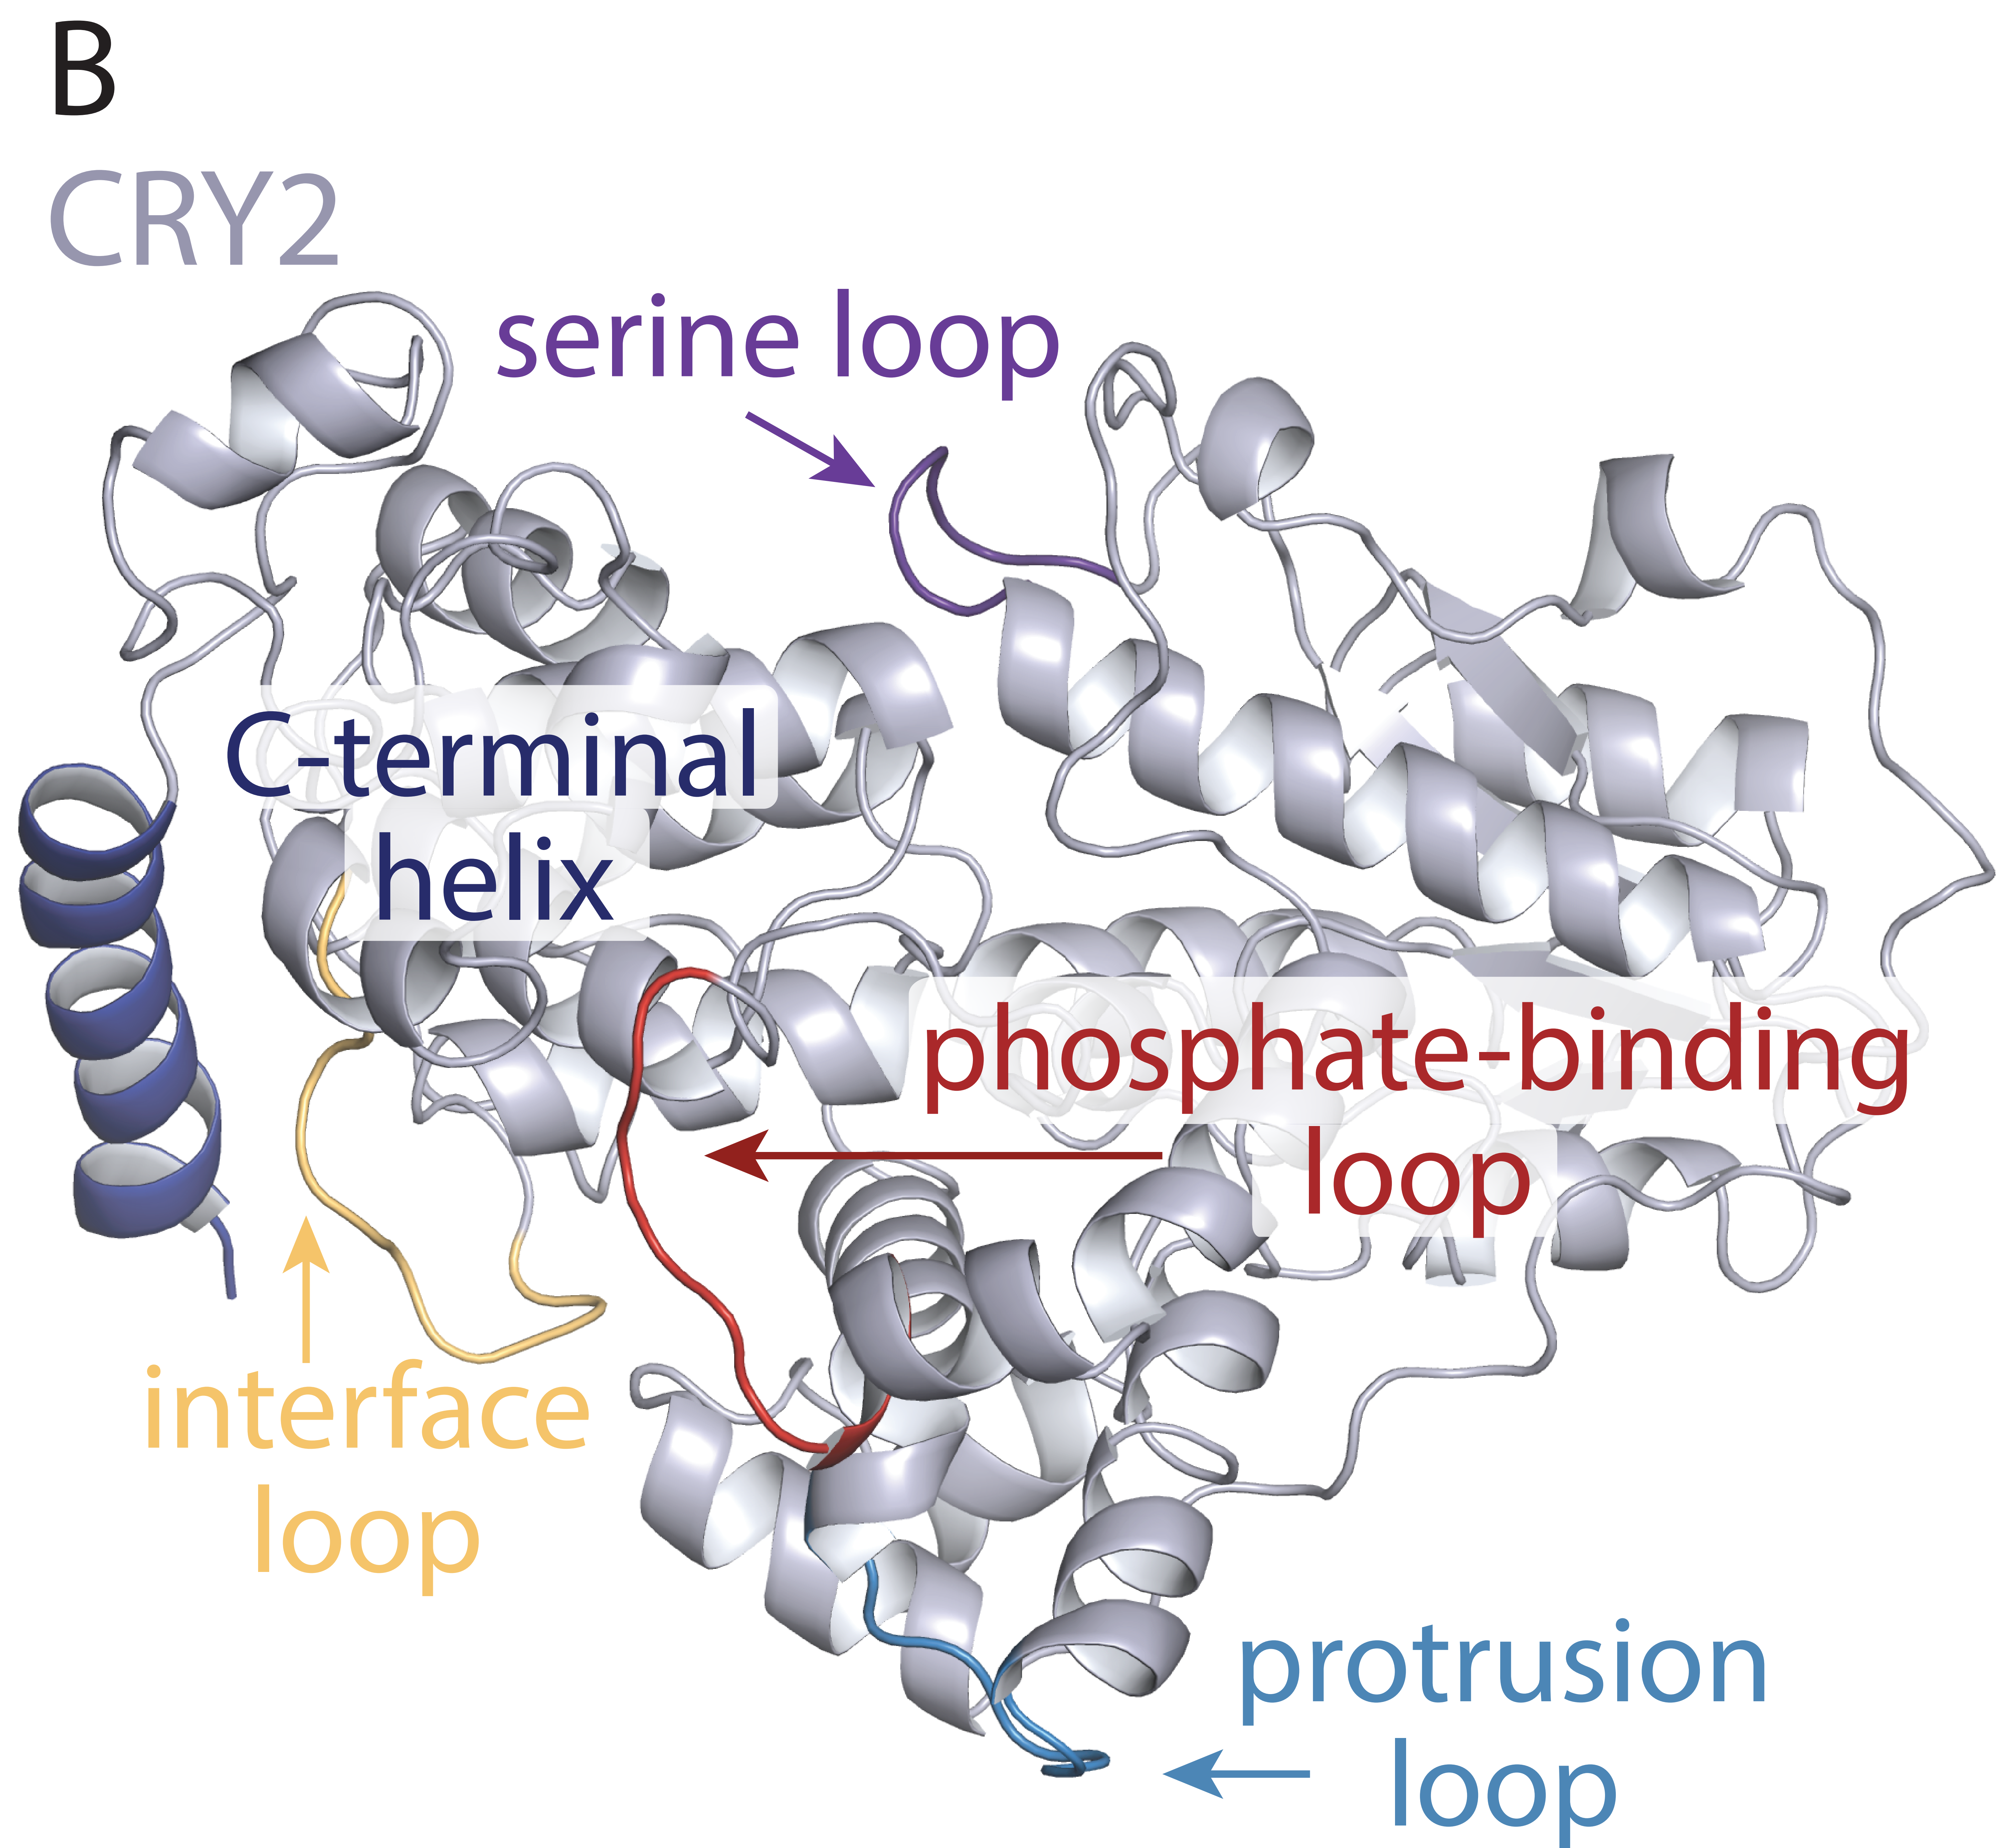

Figure 4—figure supplement 1

Supplement: supp [file elife-03674-supp-v1.zip]

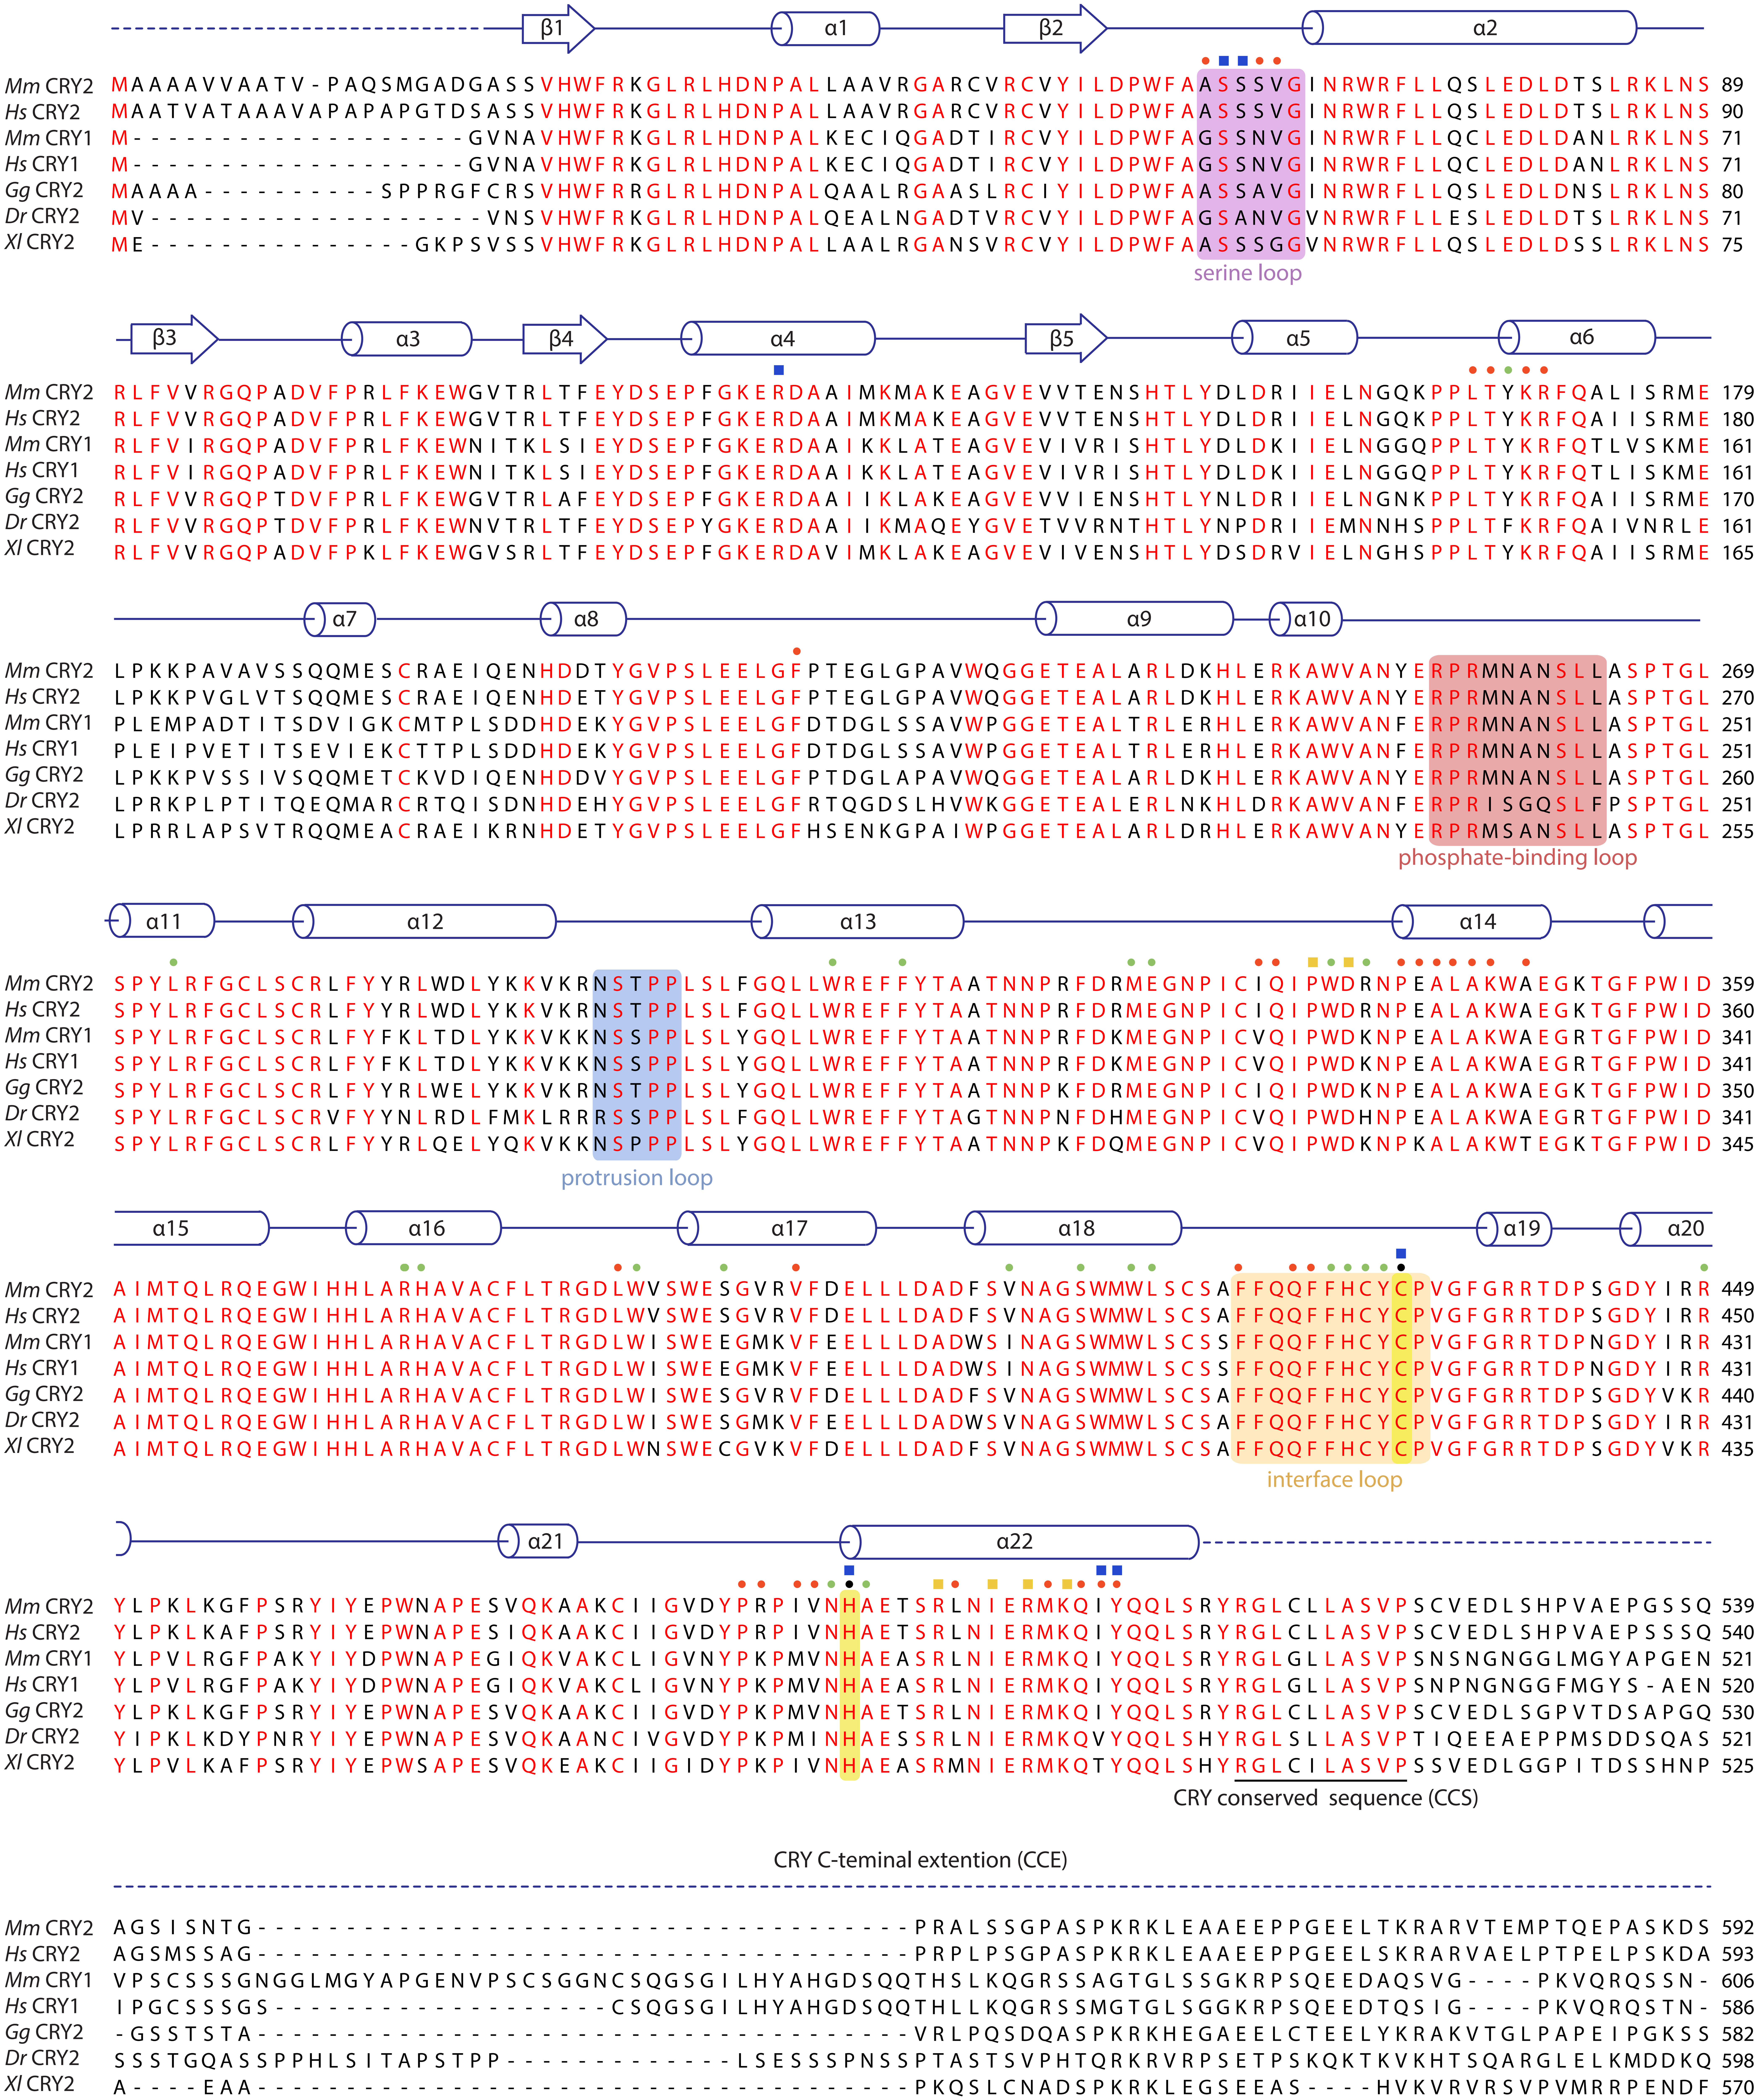

Figure 1—figure supplement 1

Supplement: supp [file elife-03674-supp-v1.zip]

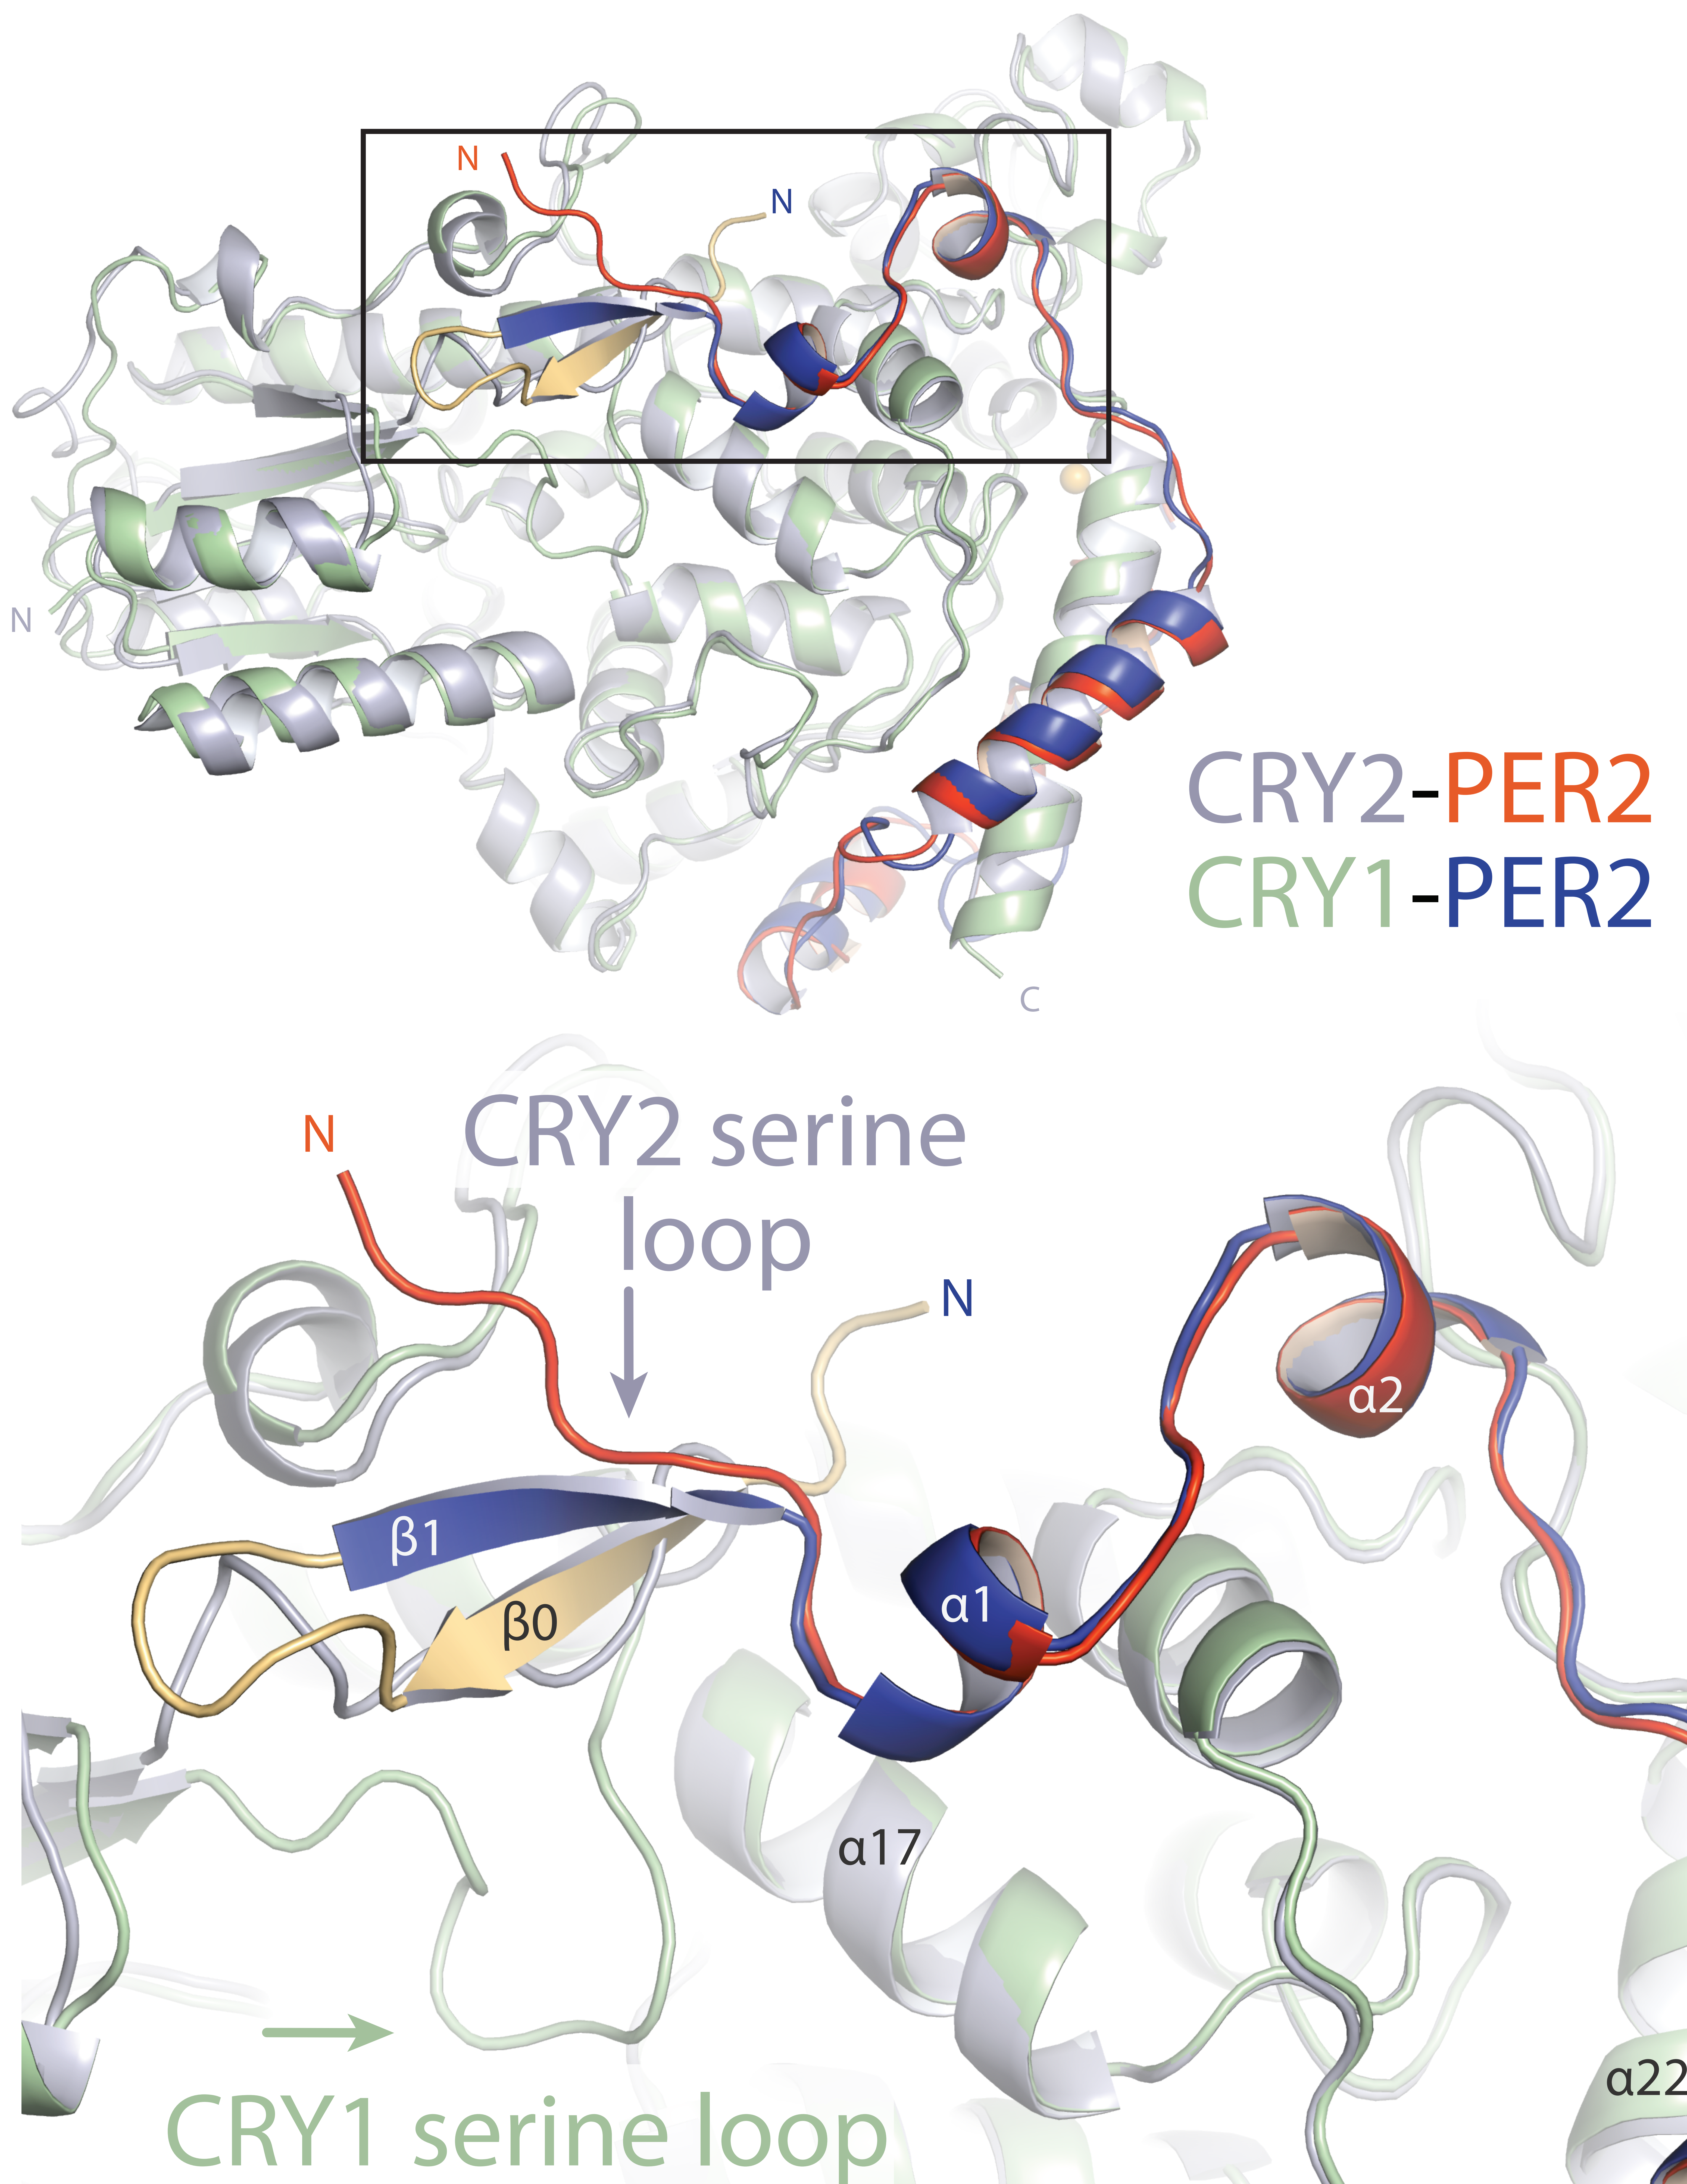

Figure 4 — figure supplement 3

Supplement: supp [file elife-03674-supp-v1.zip]

A

Input

IP:  $\alpha$ -MYC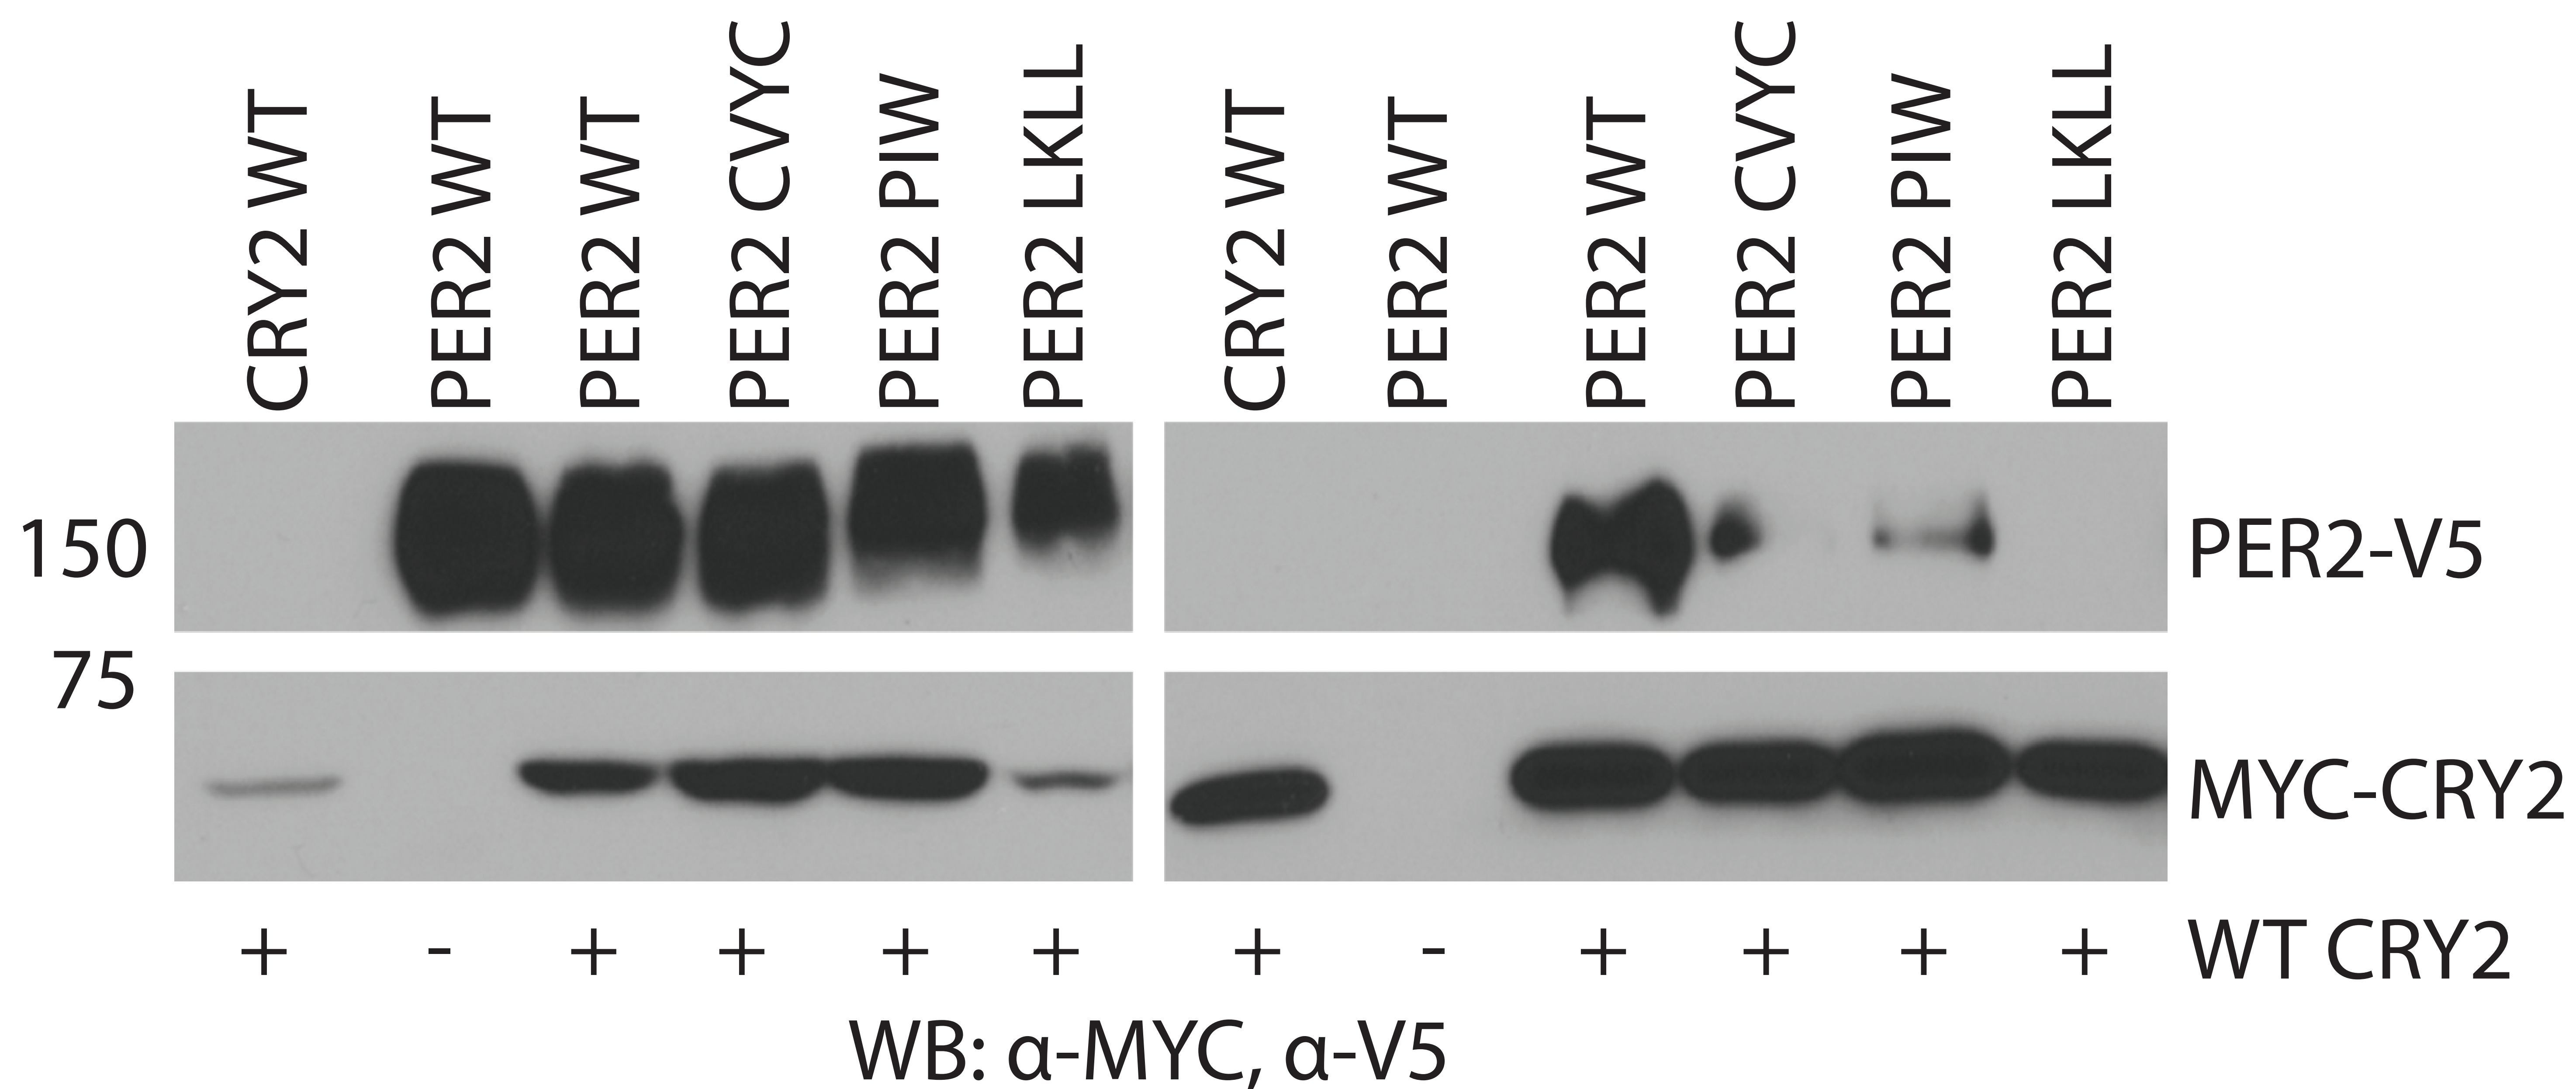

B

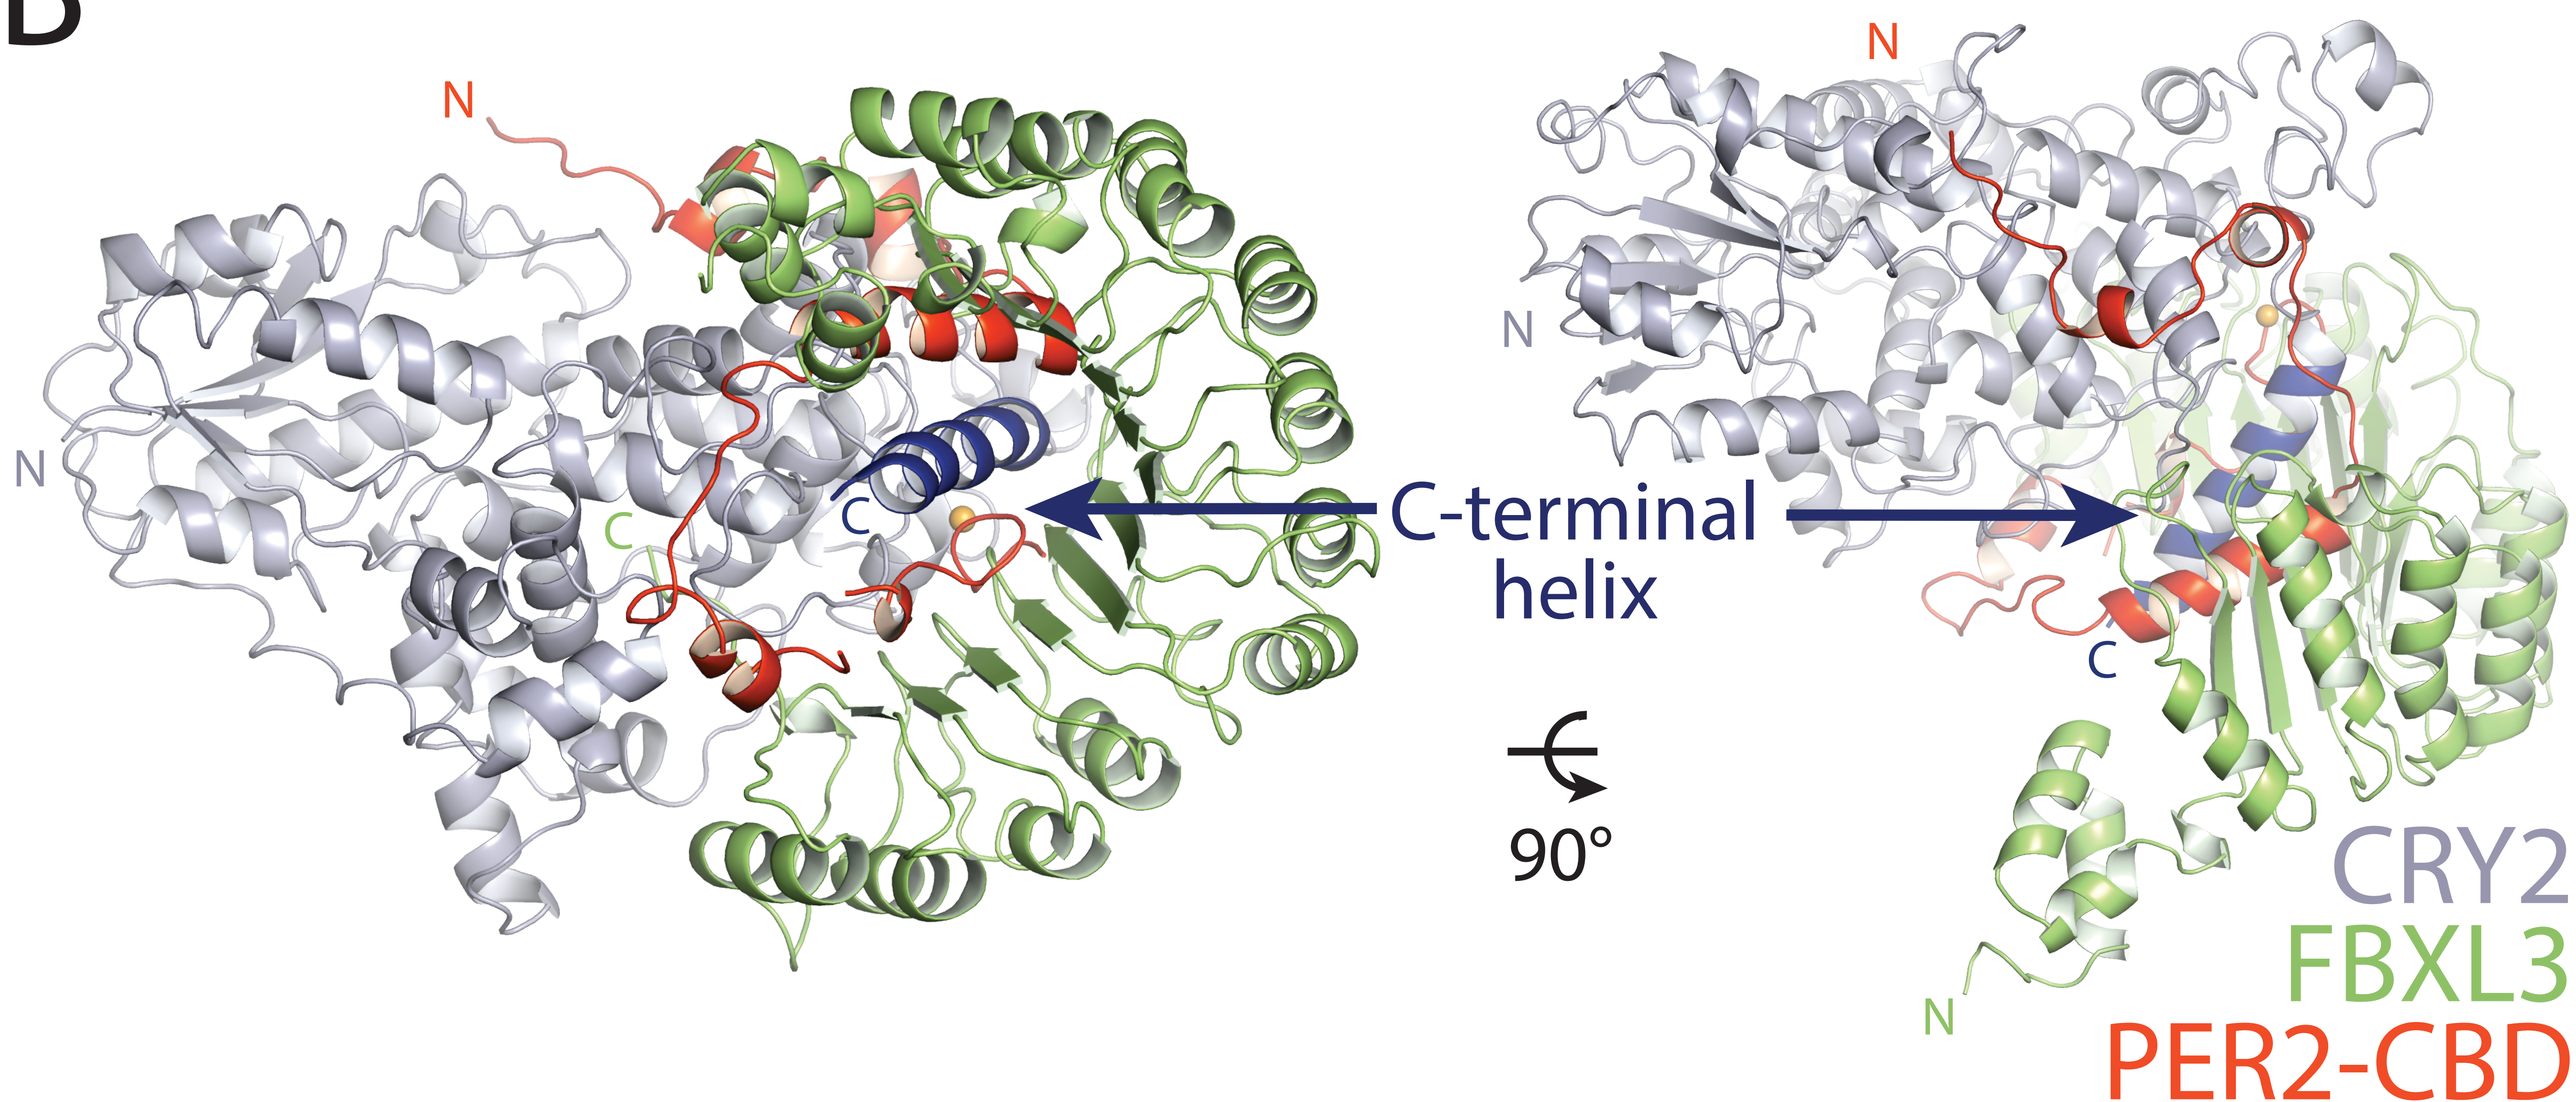

Figure 2 — figure supplement 1

Supplement: supp [file elife-03674-supp-v1.zip]
